25 lshoema1@uwyo.edu

26

27 Jonathan M. Chase, German Centre for Integrative Biodiversity Research (iDiv) Halle-Jena

28 Leipzig; Department of Computer Sciences, Martin Luther University Halle-Wittenberg;

29 jonathan.chase@idiv.de

30

31 *Running title:* Internal Metacommunity Structure

32

33 *Keywords:* Interspecific competition, site dynamic theory, hierarchical community models,

34 metacommunity paradigms, variation partitioning.

35

36 *Data accessibility statement:* Should this manuscript be accepted, the data and code supporting

37 the results will be archived in an appropriate public repository such as Github and will be

38 mirrored at Zendo or similar locations.

39

## 40 **Abstract**

41 Current analyses of metacommunity data largely focus on global attributes across the entire

42 metacommunity, such as mean alpha, beta, and gamma diversity, as well as the partitioning of

43 compositional variation across all species and sites. This view neglects that different species and

44 sites in the landscape can vary widely in how they contribute to these metacommunity-wide

45 attributes as a function of traits and site attributes. We argue that the study of this internal

46 structure can help define and describe the complex and interactive relations between process and

47 pattern in metacommunities. To illustrate this general idea, we create synthetic data using a

48 simple colonization-extinction metacommunity model, and quantify variation between species

49 and sites (what we call the ‘internal structure’ of metacommunities) using Joint Species

50 Distribution Models. We find that this perspective on internal structure of metacommunities

51 provides useful information about the distinct ways that different species and different sites  
52 contribute to metacommunity attributes. We conclude with some discussion about how these  
53 realistic complexities regarding internal structure can be incorporated into a more cohesive  
54 metacommunity theory.

55

## 56 **Introduction**

57 Recent developments in community ecology indicate that the field is undergoing an important  
58 renaissance in both its concepts and tools. One of the more exciting and important elements of  
59 this renaissance is in the use of the metacommunity concept, which recognizes the feedback  
60 between local communities and the broader-scale regional biota (Hanski and Gilpin 1991,  
61 Leibold et al. 2004 and reviewed in Leibold and Chase 2017). Earlier work focused on specific  
62 scenarios where such feedbacks could occur (e.g., Levins and Culver 1971, Horn and MacArthur  
63 1974, Levin 1974, Sloan-Wilson 1992, Leibold 1998, Hubble 2001, Amarasekare and Nisbet  
64 2001), which was synthesized into a useful categorization of the different ways in which  
65 metacommunities could be structured (Leibold et al. 2004). However, it is apparent that there is  
66 a much more complex and nuanced spectrum of possibilities regarding the mechanisms and  
67 processes underlying the structure of metacommunities (Leibold and Chase 2017). Ongoing  
68 developments, including both more sophisticated theoretical (e.g., Shoemaker and Melbourne  
69 2016, Fournier et al. 2017, Ovaskainen et al. 2019, Thompson et al. 2020) and analytical (e.g.,  
70 Legendre and DeCaceres 2013, Hui et al. 2013, Ovaskainen et al. 2017, Ohlman et al. 2018,  
71 Jabot et al. 2020) approaches, promise a new level of understanding and synthesis of the  
72 regional-local community-level feedbacks. It seems increasingly apparent that understanding the  
73 feedbacks between local communities and the regional biota is a major challenge for community

74 ecology in general (see Leibold and Chase 2017) as well as for the application of these insights  
75 to applied issues of environmental and health concerns (e.g., Bengtsson 2009, Schiesari et al.  
76 2019, Miller et al. 2019, Brown and Barney 2020).

77

78 While important progress has been made in the study of metacommunities, most work tends to  
79 assume that processes act similarly on all species and sites in a metacommunity. However,  
80 variation among species and among sites can strongly influence metacommunity-level properties  
81 of biotas. This is particularly relevant to local-regional feedbacks because species and sites vary  
82 across metacommunities. For instance, the spatial structure of environmental features among  
83 sites almost always changes different explicitly determined landscapes due to spatial contingency  
84 (Peres-Neto et al. 2012). In contrast with many previous studies (e.g., Blanchard et al. 2020,  
85 Jabot 2020), we emphasize that different species can be heterogenous in how they contribute to  
86 metacommunity level properties and that different sites can also be heterogenous in how they  
87 contribute to these patterns (but see Pandit et al. 2009, Legendre and De Cáceres 2013). Using  
88 this concept as a starting point, we highlight the importance of understanding the ‘internal  
89 structure’ of metacommunities, which can help resolve more complex dynamics that could not be  
90 resolved without taking this different perspective. Community assembly in metacommunities is a  
91 complex process that involves mechanisms related to environmental effects, species interactions,  
92 dispersal, and stochasticity as they act on a regionally-defined pool of species within a specific  
93 landscape (e.g. Vellend 2010, 2015, Weiher et al. 2011). Current analytical tools for inferring  
94 the effects of these mechanisms from metacommunity patterns focus on global metrics that  
95 describe the entire metacommunity, such as diversity metrics and coexistence patterns and  
96 variation partitioning analysis (e.g., Borcard et al. 1992, Gotelli and McCabe 2002, Leibold and

97 Mikkelsen 2002). Recent efforts have used several of these global metrics to separate  
98 metacommunity processes (Ovaskainen et al. 2019, Guzman et al. 2020). While these  
99 approaches provide insights into the processes that drive species distributions and determine their  
100 levels of interaction within metacommunities, they only characterize them in very broad terms at  
101 the larger metacommunity scale, which we consider to be the ‘external’ structure of  
102 metacommunities. Here, we focus on the ‘internal structure’ instead and thus on resolving how  
103 individual species and sites or patches contribute to such broad patterns by dissecting their  
104 individual contribution to the global metacommunity pattern (see also Fournier et al. 2017,  
105 Suzuki and Economo 2021).

106

107 To illustrate the advantages of studying the internal structure of metacommunities, we create  
108 synthetic data from a process-based metacommunity model of competition-extinction dynamics.  
109 We evaluate species-level and site-level variation using joint species distribution models  
110 (JSDMs; see review in Warton et al. 2016). We find that there can be tremendous heterogeneity  
111 between the contributions of individual species and sites to overall metacommunity structure;  
112 and that some of this heterogeneity can be identified by JSDMs and be related to attributes such  
113 as dispersal and species associations for species, or environmental uniqueness for sites.

114

115 Previous work has shown that particular examples of such effects can occur but here we seek a  
116 more general approach. For example, Pandit et al. (2009) showed that species can be  
117 heterogenous in their responses to environmental and stochastic factors depending on their  
118 degree of habitat specificity. Others have argued that JSDMs can provide important insights into  
119 the drivers of such variation in species distributions ((Hui et al. 2013, 2016, Pollock et al. 2014,

120 Ovaskainen et al. 2017 see also Ovaskainen and Abrego 2020; but see Poggiato et al. 2021).  
121 Similarly, the heterogeneity among sites has long been identified as driving individual species  
122 distributions (see Guisan and Thulliers 2005, Soberon and Peterson 2005, Elith and Leathwick  
123 2006) as well as driving overall variation among sites in global metrics of community structure  
124 (e.g. diversity patterns, etc.) as characterized by the field of landscape ecology (Turner et al.  
125 2001). Further suggestions that individual sites might vary in how they contribute to  
126 metacommunity dynamics include the concept of ‘keystone communities’ (Mouquet et al. 2012,  
127 Resetarits et al. 2017, Yang et al 2020) and metacommunity approaches to spatial networks.  
128 These disparate approaches (species vs sites) to metacommunities are likely closely related to  
129 each other and can be linked by the emerging methodologies of methods such as JSDMs to a  
130 more nuanced metacommunity ecology that recognizes a plurality of mechanisms and processes  
131 underlying community assembly. Nevertheless, we discuss some remaining important  
132 challenges to resolve in making process-pattern linkages in metacommunities (see also Poggiato  
133 et al. 2021, Miele et al. 2021).

134  
135

### 136 **Quantifying the link between process and pattern using a simple metacommunity** 137 **simulation and refined statistical approach**

138 To test and exemplify our ability to infer individual species and site contributions, we  
139 simulate data from a process-based model, which allows us to create observations with full  
140 knowledge about the underlying mechanisms. Our process-based model is based on a spatial  
141 implementation of spatially implicit site occupancy models (e.g., Levins and Culver 1971, Horn  
142 and MacArthur 1972, Levin 1974, Hastings 1980, Hanski 1991) to describe dynamics in  
143 heterogeneous metacommunities. We focused here on a model for predicting presence-absence

144 (and not abundance; but see Supporting Information) because it is the most widely available type  
145 of empirical data for metacommunity analysis. For each species in each patch, we model  
146 occupancy using two key equations (details in the Supporting Information). The first of these  
147 describes the colonization of patch  $z$  by species  $i$  during a discrete time interval,  $\Delta t$ :

$$149 \quad P(X_{i,z,t+\Delta t} = 1 | X_{i,z,t} = 0) = I_{i,z,t} S_{i,z,t} C_{i,z,t} \quad (1)$$

150  
151 where  $X_{i,z,t}$  is a stochastic variable representing the occurrence of species  $i$  at location  $z$  at time  
152  $t$ ,  $I_{i,z,t}$  is the number of immigrants of species,  $S_{i,z,t}$  is the effect of environmental filtering on the  
153 probability of establishing a viable local population, and  $C_{i,z,t}$  is the effect of ecological  
154 interactions on the establishment probability. Second, we consider the alternative possibility: the  
155 extinction of species  $i$  in patch  $z$  during the time interval  $\Delta t$ :

$$157 \quad P(X_{i,z,t+\Delta t} = 0 | X_{i,z,t} = 1) = M_{i,z,t} E_{i,z,t} \quad (2)$$

158  
159 where  $M_{i,z,t}$  and  $E_{i,z,t}$  are the responses of the extinction probability to the local environment and  
160 to ecological interactions, respectively.

161 At steady state the solution to this model is:

162

$$163 \quad \log \frac{\hat{p}^{i,z}}{1-\hat{p}^{i,z}} = \log I^{i,z} + \log \frac{S^{i,z}}{M^{i,z}} + \log \frac{C^{i,z}}{E^{i,z}} \quad (3)$$

164

165 where  $\hat{P}^{i,z}$  is the expected probability that site  $z$  is occupied by species  $i$ . This formulation  
166 assumes that immigration ( $I^{i,z}$ ), ‘environmental selection’ ( $S^{i,z}$  and  $M^{i,z}$ ) and interactions  
167 ( $C^{i,z}$  and  $E^{i,z}$ ) can be separated into distinct effects that do not interact.

168

169 Equation 3 can be analyzed by a JSDM to separate the contributions of these effects into spatial  
170 effects (driven by immigration), environmental filtering (driven by abiotic selection) and species  
171 co-distribution unrelated to either space or environment, with an additional fraction quantifying  
172 residuals resulting from stochasticity in the case of a finite number of patches (see also  
173 Shoemaker et al. 2020). Furthermore, the likelihood of every observation can be marginalized  
174 over each species (by summing the likelihoods for a given species across all patches) to describe  
175 the variation among species. Alternatively, the likelihood can be marginalized by sites (by  
176 summing the likelihoods for a patch across all species) to describe the variation across the  
177 metacommunity landscape. Doing so, we can quantify the importance of environment, species  
178 co-distribution, and space for predicting metacommunity structure as a whole, as well as their  
179 importance for predicting the presence-absence (or, in theory, the abundance) of individual  
180 species or community composition at individual patches.

181

182 Analyzing the inferred quantities, we can study the internal structure of the metacommunity. This  
183 can clarify how these key processes work together in a diverse and complex metacommunity to  
184 explain species distributions within the metacommunity (Figure 1). We also emphasize that one



185 main advantage of the proposed framework is to allow ecologists to identify the contributions of  
186 individual communities and species which are often units of personal interest and knowledge  
187 (e.g., natural history of species, place-based ecological knowledge).

188 To illustrate the utility of this approach in a more realistic framework that includes  
189 stochasticity and spatially explicit landscapes, we implemented the key processes of drift,  
190 environmental filtering, dispersal, and species interactions (Vellend 2010, 2016) in a flexible  
191 simulation version of the model (described in more details in the Supporting Information). The  
192 simulation model allows us to vary each process separately for each species in a heterogeneous  
193 spatially explicit landscape. It simulates the dynamics of a metacommunity across a set of  
194 patches and generates a spatial network that specifies the connectivity among patches. The state  
195 variables of the simulation are the occupancy of each species in every patch (i.e.  
196 presence/absence, though future implementations could also address abundance data, e.g.  
197 Rybicki et al. 2018, Ovaskainen et al. 2019, Thompson et al. 2020). Each patch can be colonized  
198 from nearby patches depending on their location in the landscape, dispersal rate of the species  
199 and proximity of extant populations in neighboring patches. Each species in each patch is subject  
200 to extinctions that reflect demographic and/or environmental stochasticity. Patches can differ in  
201 local environmental conditions that differentially influence baseline colonization and extinction  
202 probabilities. Species interactions are modeled in two ways. First, the presence of other species  
203 in a patch can modify baseline colonization probability (a reduction in the case of competition).  
204 Second, co-occurring species can modify baseline extinction probability (an increase in the case  
205 of competition).

206 We next apply a JSDM to the resulting distribution of species among patches.  
207 Specifically, we use the HMSC R package (Ovaskainen et al. 2017, Ovaskainen and Nerea 2020)

208 that models species distributions as a function the environment, spatial autocorrelation and  
209 species co-distributions. After fitting the model using HMSC, we partition variation between the  
210 model processes into four components (or fractions) using an approach akin to classic variation  
211 partitioning (Borcard et al. 1992; Peres-Neto et al. 2006). Details about how this type of variation  
212 partitioning is computed through HMSC is given in the Supporting Information. Specifically, the  
213 variation was partitioned to quantify the effects of environment (labeled [E]), spatial patterning  
214 (labeled [S]), co-distribution among species (labeled [C]) and residual (unexplained) variation  
215 that cannot be attributed to any of the three previously mentioned fractions (i.e. sets of  
216 predictors). This is expressed as  $1-R^2$ , where  $R^2$  is the proportion of variation explained by the  
217 model and includes fractions [E], [S], and [C].

218         Compared to the classical method of variation partitioning (Borcard et al. 1992, Peres-  
219 Neto et al. 2006), this approach provides two major advances. The first is that we can infer a  
220 third fraction that quantifies co-variation (or co-distribution) among species using latent  
221 variables (fraction [C]), which is distinct from either the environment effect (fraction [E]) or the  
222 spatial effects (fraction [S]). In our model this fraction reflects the consequences of species  
223 associations rather than biotic interactions, and we emphasize that this interpretation must be  
224 done with caution (see Dormann et al. 2018 and Blanchet et al. 2020 for critical reviews of this  
225 issue). In nature, this latent fraction may also reflect other sources of variation such as those  
226 from unmeasured environmental variables. Similar points have been raised in metacommunity  
227 analysis regarding the interpretation of model variation due to spatial autocorrelation as these  
228 could be related to spatialized environmental effects due to unmeasured environmental factors  
229 (Peres-Neto et al. 2012). The second advance is that all fractions are calculated at the species  
230 level, where species-specific variation detail the internal structure of the metacommunity from

231 the perspective of each individual species. Fractions of the variation at the metacommunity level  
232 are then calculated by averaging across all species to obtain metacommunity (global) level  
233 descriptors as those obtained from variation partitioning. This allows us to subsequently  
234 examine potential drivers (environment, space and joint co-distribution) underlying the variation  
235 in these different effects among species. In addition, we implemented a partitioning scheme to  
236 quantify how each site separately contributes to different drivers as described in the Supplement  
237 Information. This way to partition variation among sites informs us about the individual  
238 contribution each site has to variation in the data for each set of drivers. The ability to resolve  
239 species-specific and site-specific components means that we can study the 'internal structure' of  
240 the metacommunity in ways that were absent in classic variation partitioning.

241         Although the analytical model described in equations 1-3 suggests that making links  
242 between processes and patterns using JSDMs are possible, we wished to evaluate if this was also  
243 likely in less idealized situations such as those used in our metacommunity model. To do this,  
244 we simulated a number of scenarios that vary the strength of environmental selection, dispersal  
245 and competition. Comparing scenarios with varying niche breadth and competition (scenarios  
246 A-D, Fig. 2 and Fig 3), and a more complex case where species compete and vary in both  
247 dispersal and in their responses to the environment (scenario G, Figure 4, scenarios E and F in  
248 the SI) highlight how HMSC provides an avenue for distinguishing between underlying  
249 processes based on abundances of species across metacommunity patches. Using our  
250 framework, our goal here is to illustrate how links between pattern and process might be made in  
251 metacommunities. In doing so, we leave a more extensive and systematic evaluation of the  
252 model's components (e.g., performance of JSDMs under multiple complex scenarios) for future  
253 work (but see Ovaskainen and Nerea 2020).

254

## 255 **Simulation experiments**

256         In a first set of simulations, we considered a situation where species had distinct  
257 environmental optima along an environmental gradient and had limited dispersal (Figure 2,  
258 Table 1). We contrasted the case where the environmental niches were narrow (steep changes in  
259 baseline colonization success and extinction rates with small deviations in environment) with the  
260 case with identical optima, but with wide environmental niches (much weaker changes in  
261 colonization and extinction with environmental value). As expected, we find that these  
262 differences in environmental niche breadth had strong effects on the relative importance of  
263 environmental filtering (fraction [E]) versus spatial patterning (fraction [S]). Specifically, we  
264 find stronger spatial patterning when niche breadths were broad and stronger environmental  
265 filtering when niches were narrower (Figure 2, Table 1). We also found that the  $R^2$  values were  
266 higher for the case with narrow niches than with wide niches. Finally, we found non-zero  
267 (though relatively weak) variance components for co-distributions (fraction [C]) in both cases,  
268 especially when niches were broad even though our analytical model would predict the absence  
269 of such variation components since colonization and extinctions were not affected by species  
270 interactions in these simulations.

271 We next simulated metacommunities with identical parameters as above, except with added  
272 interspecific competition effects (Figure 3, Table 1). As in the case without species interactions  
273 (compare with Figure 2), narrow niches enhanced the relative strength of environmental filtering  
274 (fraction [E]) and reduced spatial patterning (fraction [S]) when compared to wide niches. In  
275 these simulations, however, the co-distribution components (fraction [C]) were much more  
276 substantial than without species interactions. We also found that adding interspecific

277 competition substantially increased the total amount of variation explained ( $R^2$ ) by the model  
278 (i.e. due to the joint component of co-distribution).

279 We conducted a number of other simulations to explore if that describe interspecific  
280 variation on environment (fraction [E]), space (fraction [S]), and co-distributions (fraction [C])  
281 depend on the dispersal, niches breadth, and interactions. Illustrative examples are shown in the  
282 supplemental information and summary statistics are shown in Table 1. In Figure 4, we present  
283 the results from one of these examples that includes heterogenous dispersal to show how the  
284 internal structure can reveal how dispersal variation affects species distributions. We found that  
285 one could distinguish species by the degree to which their distributions are related to  
286 environment (fraction [E]), space (fraction [S]) and co-distributions (fraction [C]) (Figure 5a)  
287 and we found that this could be related to their traits (i.e., species optima in our simulation  
288 framework). Species with higher dispersal ability and more specialized environmental niche  
289 positions had distributions better predicted by the environment than those that were dispersal  
290 limited and had distributions that presented a higher level of spatial autocorrelation (fraction [S]).  
291 Species with optima closer to the middle of the environmental gradient also had a larger fraction  
292 [C] than those with more extreme optima.

293 Sites also differed in how their species composition was related to environmental  
294 (fraction [E]) and spatial effects (fraction [S]) as well as co-distributions (fraction [C]) - Figure  
295 4b). Some sites tended to be occupied by locally dominant species (in the lower left of the  
296 ternary plot, nearer to fraction [E]), while others were occupied by species found in nearby sites  
297 (lower right of the ternary plot, nearer to fraction [S]). Some sites were also occupied by  
298 combinations of species that were differentially associated with each other regardless of  
299 environment or dispersal (upper apex of the ternary plot, nearer to fraction [C]). As can be seen

300 in Figure 4b, there were also a wide range of intermediate conditions. A major driver of this  
301 variation is the local environmental condition, especially in relation to how distinct the local  
302 environment is from the overall mean environment of the metacommunity (Figure 5b).

303 We further investigated the structure of the species co-distribution (fraction [C]). This  
304 covariation can be directly attributable to species interactions because we explicitly model the  
305 processes underlying metacommunity dynamics. However, even in our model, species co-  
306 distribution may not directly link to pairwise interaction coefficients, but rather may emerge as a  
307 complex relationship between species interactions and environmental conditions (Cazelles et al.  
308 2015, Blanchet et al. 2020). To illustrate this, we show the co-distribution among species as a  
309 heat map separately for each of the five individual simulations presented in Figure 4 and  
310 compared them to the actual interaction matrix that describes interspecific competition in our  
311 model (Figure 6; similar heat maps obtained with the other scenarios are shown in the  
312 Supplement Information). Despite the fact that the same interaction matrix was used for all five  
313 of these simulations, the resulting co-distribution patterns are inconsistent in their details.  
314 However, these matrices show that there is consistency in several features of the co-distribution  
315 pattern. For example, they all share the predominance of strong negative correlations along the  
316 main diagonal that match the interaction matrix we used. They also share a strong  
317 ‘checkerboard’ pattern with alternating negative and positive co-distributions between species  
318 when these are ranked against their environmental optima. Given the simple scheme of species  
319 interactions we used (Fig. 5 and SI), these results are consistent with the predictions that direct  
320 interactions are stronger than indirect ones and tend to weaken with the number of links in  
321 indirect chains even if the details of these effects are less predictable.

322

## 323 **Discussion**

324           While metacommunity ecology has made great progress in the past decades, the  
325 assumptions that species and sites were relatively homogeneous in their underlying processes  
326 (reviewed in Leibold and Chase 2017) have limited the applicability of metacommunity theory to  
327 more realistic species pools within complex landscapes. Here, by combining a tractable process-  
328 based model with emerging analytical methods, we provide a general quantitative approach that  
329 accounts for multiple interacting processes that may operate differently among species or in  
330 different parts of landscapes.

331           Although there are some important challenges to consider, our study illustrates important  
332 insights about the internal structure of metacommunities, including:

- 333 **1)** Variation partitioning using JSDMs (here implemented using HMSC) can be linked to basic  
334 processes of community assembly at the species and sites levels (e.g. environmental selection,  
335 dispersal, biotic selection, and drift).
- 336 **2)** Quantifying co-distributions of species in metacommunities can improve predictive ability  
337 even when the processes that generate these distributions are complex (stochasticity, complex  
338 spatial landscapes, and species interactions).
- 339 **3)** Species can have distributions that vary in the degree to which they are determined by  
340 combinations of the basic community assembly processes depending on features of their ecology  
341 (e.g. dispersal and environmental preferences); and
- 342 **4)** The predominant assembly processes that determine local communities can differ among  
343 adjacent sites in a metacommunity (e.g. sites that are occupied by species most fit for  
344 environmental conditions vs sites occupied by species in nearby sites that may differ in  
345 environmental conditions).

346           It is important to emphasize that there remain some substantial challenges in moving  
347 forward with the overall approach we advocate in this paper. This includes some technical  
348 issues, such as the estimation of parameters and interpretation of results in more complex  
349 metacommunity models in JSDMs, as well as conceptual ones, such as accounting for other  
350 processes such as speciation, local adaptation, historical biogeography. Nevertheless, we see that  
351 such endeavor will be fruitful, allowing a deeper understanding of ecological dynamics in more  
352 realistic, but necessarily complex, spatial landscapes.

353           Our analytical framework simplifies several potentially complex processes (e.g. non-  
354 linearities and interactive effects of mechanisms) into an approximation involving colonization-  
355 extinction dynamics. It is possible that more realistic and complex mechanisms driving these  
356 processes will weaken associations between pattern and process or create biases in the  
357 partitioning of the variation revealed by JSDMs. However, the developments of JSDMs are still  
358 progressing, and we anticipate that future developments will solve some of these problems (see  
359 Wilkinson et al. 2020).

360           The co-distribution component of the JSDMs (fraction [C]) is particularly concerning.  
361 We find that this component can be biased, especially when species have broad environmental  
362 niches (Figure 2). It is widely recognized that there are particular challenges in quantifying and  
363 interpreting species co-distributions (reviewed by Blanchet et al. 2020). Perhaps the most  
364 obvious challenge is that this component can reflect any process that is inadequately quantified  
365 by the environmental (fraction [E]) and spatial components (fraction [S]). In addition to species  
366 interactions, this would include, for example, unmeasured environmental factors (see Blanchet et  
367 al. 2020) or inadequately quantified landscape attributes. Teasing apart the effects of species  
368 interactions from these confounding factors should thus be a major focus for future work.



369 Nevertheless, it is important to understand that including the co-distribution component in our  
370 analyses allows us to account for them, rather than lumping them with residual variation where  
371 they have likely given a greatly exaggerated impression of stochasticity.

372         The basic framework we used to address the process to pattern links is most transparent  
373 for mechanisms that focus on interspecific competition because of the analogies with  
374 evolutionary genetics (Vellend 2010, 2016). However, species interactions in metacommunities  
375 are much more variable and include consumer-resource interactions, mutualisms, and facilitative  
376 interactions. Although such interactions can easily be incorporated in simulations, the  
377 interpretation that might link process to pattern in such cases are likely to become more complex.  
378 Likewise, future work could include local (co-)evolutionary dynamics (see Urban et al. 2020)  
379 and historical effects of biogeography and speciation (e.g. Leibold and Chase 2018, Overcast et  
380 al. 2020). Here, we have also retained a simple two-level perspective on spatial scale (local  
381 discrete sites in a broader regional landscape). It is increasingly apparent that metacommunity  
382 dynamics occur over multiple nested scales and that habitats can be continuous and/or nested,  
383 rather than discretely patchy (e.g. Munkenmuller et al. 2012, Rybicki et al 2018, Ovaskainen et  
384 al. 2019, Viana and Chase 2019, König et al. 2021)Refining our approach to address multiple  
385 spatial scales is a logical next step.

386         Finally, it is increasingly clear that temporal dynamics of community change in  
387 metacommunities can provide critical insights about the mechanisms that drive metacommunity  
388 patterns (e.g. Jabot et al. 2020, Blanchard et al. 2020, Guzman et al. 2021). We imagine future  
389 work on the internal structure of metacommunities as being very amenable to incorporating  
390 temporal changes (see for example, Ovaskainen et al. 2017 for an initial step in this direction).  
391 Here we have focused on purely spatial approaches because there are still remarkably few studies

392 that might permit sufficiently structured data to permit temporal analyses and because the  
393 limitations and challenges of such analyses are not yet clear.

394 We have argued that a focus on the internal structure of metacommunities, by examining  
395 site-specific and species-specific variation components, can enhance our study of the links  
396 between process and pattern in the distributions of species and the occupancies of sites. We also  
397 argue that continued work on this focus is essential if metacommunity ecology is to address the  
398 dynamics and structure of realistic metacommunities that have typically high biodiversity and  
399 occur in complex landscapes. This focus on internal structure represents a shift from traditional  
400 approaches that used descriptors of overall variation components at the metacommunity scale  
401 that generalizes previous ad hoc approaches to similar internal variation in metacommunity  
402 patterns (e.g. Pandit et al. 2009, Legendre and De Cáceres 2013). The dynamics and structure of  
403 distributions of realistically diverse species in a realistically structured landscape of sites likely  
404 involves the interaction of community assembly processes including environmental filtering,  
405 dispersal, and drift, and these are unlikely to be adequately described by simple metacommunity  
406 level metrics (see Ovaskainen et al. 2019). Consequently, dissecting the internal structure of  
407 metacommunities on the basis of species and site contributions could provide key insights into  
408 the processes underlying metacommunity assembly. Such insights might be particularly useful  
409 in the management of landscapes and metacommunities for conservation purposes since they  
410 focus on particular units (species or sites) that are often the focus of concern in such cases.

411

412 **Acknowledgments:** This paper emerged from workshops funded with the support (to JMC)  
413 from the German Centre for Integrative Biodiversity Research (iDiv) Halle-Jena-Leipzig funded  
414 by the German Research Foundation (FZT 118). MAL would like to acknowledge the

415 Alexander von Humboldt Foundation for a Research Award that helped fund this work. LDM  
416 acknowledges KU Leuven Research Fund project C/2017/002 and FWO projects G0B9818 and  
417 G0C3818. We also thanks F. Engel, C. Rakowski, K. Taylor, R. Pelinson, X. Zhao, L. Juen, T.  
418 Michelan and A. Rudolf for comments on earlier versions of the manuscript.

419

## 420 **References**

- 421 Amarasekare, P. , & Nisbet R. M. (2001). Spatial heterogeneity, source-sink dynamics, and the  
422 local coexistence of competing species. *The American Naturalist*, 158, 572-584.
- 423 Bengtsson J. (2009). Applied (meta)community ecology: diversity and ecosystem services at the  
424 intersection of local and regional processes. In: Verhoef HA and Morin PJ (Eds),  
425 Community Ecology: Processes, Models, and Applications. Oxford, UK: Oxford  
426 University Press.
- 427 Blanchard, G., Birnbaum, P., & Munoz, F. (2020). Extinction–immigration dynamics lag behind  
428 environmental filtering in shaping the composition of tropical dry forests within a  
429 changing landscape. *Ecography*, 43, 869-881.
- 430 Blanchet, F.G., Cazelles, K., & Gravel, D. (2020). Co-occurrence is not evidence of ecological  
431 interactions. *Ecology Letters*, 23, 1050–1063.
- 432 Borcard, D., Legendre, P., & Drapeau, P. (1992). Partialling out the spatial component of  
433 ecological variation. *Ecology*, 73, 1045–1055.
- 434 Boulangeat, I., Gravel, D., & Thuiller, W. (2012). Accounting for dispersal and biotic  
435 interactions to disentangle the drivers of species distributions and their abundances. *Ecology*  
436 *Letters*, 15, 584-593.

- 437 Brown, B.L., & Barney, J.N. (2021). Rethinking Biological Invasions as a Metacommunity  
438 Problem. *Frontiers in Ecology and Evolution*, 8, 584701.
- 439 Brown, B.L., Sokol, E.R., Skelton, J., & Tornwall, B. (2017). Making sense of  
440 metacommunities: dispelling the mythology of a metacommunity typology. *Oecologia*, 183,  
441 643–652.
- 442 Cottenie, K. (2005). Integrating environmental and spatial processes in ecological community  
443 dynamics: Meta-analysis of metacommunities. *Ecology Letters*, 8, 1175–1182.
- 444 Dormann, C.F., Bobrowski, M., Dehling, M. et al. (2018). Biotic interactions in species  
445 distribution modelling: ten questions to guide interpretation and avoid false conclusions.  
446 *Global Ecology and Biogeography*, 27,1004-1016.
- 447 Elith, J., & Leathwick, J.R. (2009). Species Distribution Models: Ecological Explanation and  
448 Prediction Across Space and Time. *Annual Review of Ecology, Evolution, and Systematics*,  
449 40, 677–697.
- 450 Fournier, B., Mouquet, N., Leibold, M.A., & Gravel, D. (2017). An integrative framework of  
451 coexistence mechanisms in competitive metacommunities. *Ecography*, 40, 630–641.
- 452 Gotelli, N.J., & McCabe, D.J. (2002). A meta-analysis of J. M. Diamond’s assembly rules  
453 model. *Ecology*, 83, 2091-2096.
- 454 Gravel, D., Canham, C.D., Beaudet, M., & Messier, C. (2006). Reconciling niche and  
455 neutrality: the continuum hypothesis. *Ecology Letters*, 9, 399–409.
- 456 Gravel, D., & Massol, F. (2020). Toward a general theory of metacommunity ecology. *In*:  
457 McCann, K.S. & Gellner, G. (eds.). *Theoretical Ecology*. Oxford University Press. *In press*.
- 458 Guisan, A., & Thuiller, W. (2005). Predicting species distribution: offering more than simple  
459 habitat models. *Ecology Letters*, 8, 993-1009.

- 460 Guzman, L.M., Germain, R.M., Forbes, C., Straus, S., O'Connor, M. I., Gravel, D. Srivastava,  
461 D.S., & Thompson, P.L. (2019). Towards a multi-trophic extension of metacommunity  
462 ecology. *Ecology Letters*, 22, 19-33.
- 463 Guzman, L.M., Thompson, P.L., Viana, D.S., Vanshoenwinkel, B., Horvath, Z., Ptacnik, R.,  
464 Jeliaskov, A., Gascon, S., Lemmens, P., Anton-Pardo, M., Langenheder, S., De Meester, L.,  
465 & Chase, J.M. (2021). Disentangling metacommunity processes using multiple metrics in  
466 space and time. <https://www.biorxiv.org/content/10.1101/2020.10.29.361303v1>
- 467 Hanski, I. (1991). Single-species metapopulation dynamics: concepts, models and observations.  
468 *Biological Journal of the Linnean Society of London*. 42, 17-38.
- 469 Hanski, I., & M. Gilpin. (1991). Metapopulation dynamics: brief history and conceptual  
470 domain. *Biological Journal of the Linnean Society of London*. 42, 3-16.
- 471 Hastings, A. (1980). Disturbance, coexistence, history, and competition for space. *Theoretical*  
472 *Population Biology*, 18, 363–373.
- 473 Horn, H.S., & MacArthur, R.H. (1972). Competition among fugitive species in a harlequin  
474 environment. *Ecology*, 53, 749–752.
- 475 Hubbel, S. P. (2001). The Unified Neutral theory of Biodiversity and Biogeography. Princeton  
476 University Press. Princeton, N.J.
- 477 Hui, F.K.C., Warton, D.I., Forster, S.D., & Dunston, P.K. (2013). To mix or not to mix:  
478 comparing the predictive performance of mixture models vs. separate species distribution  
479 models. *Ecology*, 94, 1913-1919.
- 480 Hui, F.K.C. (2016). boral – Bayesian Ordination and Regression Analysis of Multivariate  
481 Abundance Data in r. *Methods in Ecology and Evolution*, 7, 744–750.

- 482 Jabot, F., Laroche, F., Massol, F., Arthaud, F., Crabot, J., Dubart, M., Blanchet, S., Munoz, F.,  
483 David, P., & Datry, T. (2020). Assessing metacommunity processes through signatures in  
484 spatiotemporal turnover of community composition. *Ecology Letters*, 23, 1330-1339.
- 485 König, C., Wuest, R.O., Graham, C.H., Karger, D.N., Sattler, T., Zimmerman, N.E. & Zurell, D.  
486 (2021). Scale dependence of joint species distribution models challenges interpretation of  
487 biotic interactions. *Journal of Biogeography*, in press.
- 488 Lawton, J.H. (1999). Are there general laws in ecology? *Oikos*, 84, 177.
- 489 Legendre, P., & De Cáceres, M. (2013). Beta diversity as the variance of community data:  
490 dissimilarity coefficients and partitioning. *Ecology Letters*, 16, 951-963.
- 491 Leibold, M.A. (1998). Similarity and coexistence in regional biotas. *Evolutionary Ecology*, 12,  
492 95-110.
- 493 Leibold, M.A., & Chase J.M. (2018). *Metacommunity ecology*. Princeton University Press,  
494 Princeton.
- 495 Leibold, M.A., Economo, E.P., & Peres-Neto, P. (2010). Metacommunity phylogenetics:  
496 separating the roles of environmental filters and historical biogeography. *Ecology Letters*, 13,  
497 1290–1299.
- 498 Leibold, M.A., Holyoak, M., Mouquet, N., Amarasekare, P., Chase, J.M., Hoopes, M.F., *et al.*  
499 (2004). The metacommunity concept: a framework for multi-scale community ecology.  
500 *Ecology Letters*, 7, 601–613.
- 501 Leibold, M.A., & McPeck, M.A., (2006). Coexistence of the niche and neutral perspectives in  
502 community ecology. *Ecology*, 87, 1399-1410.
- 503 Leibold, M.A., & Mikkelsen, G.M. (2002). Coherence, species turnover, and boundary  
504 clumping: elements of meta-community structure. *Oikos*, 97, 237–250.

- 505 Levin, S.A. (1974). Dispersion and population interactions. *American Naturalist*, 108, 207-228.
- 506 Levins, R., & Culver, D. (1971). Regional coexistence of species and competition between rare  
507 species. *Proceedings of the National Academy of Sciences, U.S.A.*, 68, 1246-1248.
- 508 Lindstrom, E.S., & Langenheder, S., (2012). Local and regional factors influencing bacterial  
509 community assembly. *Environmental Microbiology Reports*, 4, 1-9.
- 510 Logue, J.B., Mouquet, N., Peter, H., & Hillebrand, H. (2011). Empirical approaches to  
511 metacommunities: a review and comparison with theory. *Trends in Ecology & Evolution*, 26,  
512 482–491.
- 513 Miller, E.T., & Bohannan, B. (2019). Life between patches: Incorporating microbiome biology  
514 alters the predictions of metacommunity models. *Frontiers in Ecology and Evolution*, 7, 276.
- 515 Mouquet, N., Gravel, D., Massol, F., & Calcagno V. (2012). Extending the concept of keystone  
516 species to communities and ecosystems. *Ecology Letters*, 16, 1-8.
- 517 Münkemüller, T., de Bello, F., Meynard, C. N., Gravel, D., Lavergne, S., Mouillot, D.,  
518 Mouquet, N., & Thuiller, W. (2012). From diversity indices to community assembly  
519 processes: a test with simulated data. *Ecography*, 35, 468–480.
- 520 Ohlman, M., Mazel, F., Chalmandrier L., Bec, S., Coissac, E., Gielly, L., Pansu, J., Schilling,  
521 V., Taberlet, P., Zinger, L, Chave, J., & Thuiller, W. (2018). Mapping the imprint of biotic  
522 interactions on b-diversity. *Ecology Letters*, 21, 1660-1660.
- 523 Ovaskainen, O., & Abrego, N., (2020). Joint Species Distribution Modelling  
524 With Applications in R. Cambridge University Press.
- 525 Ovaskainen, O., Tikhonov, G., Norberg, A., Guillaume Blanchet, F., Duan, L., Dunson, D., *et*  
526 *al.* (2017). How to make more out of community data? A conceptual framework and its  
527 implementation as models and software. *Ecology Letters*, 20, 561–576.

- 528 Ovaskainen, O., Rybicki, J., & Abrego, N. (2019). What can observational data reveal about  
529 metacommunity processes? *Ecography*, 42, 177-1886.
- 530 Overcast, I., Ruffley, M., Rosindell, J., Harmon, L., Borges, P.A.V., Emerson, B.C., Etienne,  
531 R.S., Gillespie, R., Krehenwinke, H., Mahler, D.L., Massol, F., Parent, C.E., Patino, J., Peter,  
532 B., Week, B., Wagner, C., Hickerson, M.J., & Rominger A. (2020). A unified model of  
533 species abundance, genetic diversity, and functional diversity reveals the mechanisms  
534 structuring ecological communities. bioRxiv 10.1101/2020.01.30.927236.
- 535 Pandit, S.N., Kolasa, J., & Cottenie, K. (2009). Contrasts between habitat generalists and  
536 specialists: an empirical extension to the basic metacommunity framework. *Ecology*, 90,  
537 2253–2262.
- 538 Poggiato, G., Munkenuller, T., Bruystova, D., Arbel, J., Clark, J.S., & Thuiller, W. (2021). On  
539 the interpretation of Joint Modelling in community ecology. *Trends in Ecology and*  
540 *Evolution*. (in press).
- 541 Peres-Neto, P.R., Legendre, P., Dray, S., & Borcard, D. (2006). Variation partitioning of species  
542 data matrices: Estimation and comparison of fractions. *Ecology*, 87, 2614–2625.
- 543 Peres-Neto, P.R., Leibold, M.A., & Dray, S. (2012). Assessing the effects of spatial contingency  
544 and environmental filtering on metacommunity phylogenetics. *Ecology*, 93, S14–S30.
- 545 Pollock, L.J., Tingley, R., Morris, W.K., Golding, N., O’Hara, R.B., Parris, K.M., et al. (2014).  
546 Understanding co-occurrence by modelling species simultaneously with a Joint Species  
547 Distribution Model (JSDM). *Methods in Ecology and Evolution*, 5, 397–406.
- 548 Resetarits, E.J., Cathey, S.E., & Leibold M.A. (2017). Testing the keystone community concept:  
549 effects of landscape, patch removal, and environment on metacommunity structure. *Ecology*,  
550 99, 57-67.



- 551 Ricklefs, R.E. (1987). Community diversity: Relative roles of local and regional processes.  
552 *Science*, 235, 167–171.
- 553 Rybicki, J., Abrego, N., & Ovaskainen, O., (2019). Habitat fragmentation and species diversity  
554 in competitive communities. *Ecology Letters*, 23, 506-517.
- 555 Schiesari, L., Matias, M.G., Prado, P.I., Leibold M.A., Albert, C.H., Howeth, J.G., Leroux S.H.,  
556 Pardini, R., Siqueira, T., Brancalion, P.H.S., Cabeza, M., Coutinho, R.M. Diniz-Filho,  
557 J.A.D.F., Fournier, B. Lahr, D.J.G., Lewinsohn, T.M., Martins, A., Morsello, C., Peres-Neto,  
558 P.R., Pillar, V.D., & Vazques, D.P. (2019). *Perspectives in Ecology and Conservation*, 17,  
559 172-181.
- 560 Shoemaker, L.G., & Melbourne B.A. (2016). Linking metacommunity paradigms to spatial  
561 coexistence mechanisms. *Ecology*, 97, 2436–2446.
- 562 Shoemaker, L.G., Sullivan, L.L., Donohue, I., Cabral, J.S., Williams, R.J. Mayfield M.M.,  
563 Chase, J.M., Hcu, C. Harpole, W.S., Huth, A., HilleRisLambers, J., James, A.R.M., Kraft,  
564 N.J.B., May, F., Muthukrishnan, R., Satterlee, S., Taubert, F., Wang, X., Wiegand, T.,  
565 Yang, Q., & Abbott, K.S. (2020). Integrating the underlying structure of stochasticity into  
566 community ecology. *Ecology*, 101, e02922.
- 567 Sloan-Wilson, D. (1992). Complex Interactions in Metacommunities, with Implications for  
568 Biodiversity and Higher Levels of Selection. *Ecology*, 73. 1984-2000.
- 569 Soberon, J., & Peterson, A.T. (2005). Interpretation of models of fundamental ecological niches  
570 and species distributional areas. *Biodiversity Informatics*, 2, 1-10.
- 571 Suzuki, Y., & Economo, E.P. (2021). From species sorting to mass effects: spatial network  
572 structure mediates the shift between metacommunity archetypes. *Ecography*, 44, 1-12.

- 573 Thompson, P.L., Guzman, L.M., De Meester, L., Horvath, P., Ptacnik, R., Vanschoenwinkle, B.,  
574 Viana, D.S., & Chase, J.M. (2019). A process-based framework for metacommunity ecology.  
575 *Ecology Letters*, 9, 1314-1329.
- 576 Turner MG. (2005). Landscape ecology: what is the state of the science? *Annual Reviews of*  
577 *Ecology, Evolution and Systematics*, 36, 319–44.
- 578 Urban, M.C., Strauss, S.Y., Pelletier, F., Palkovacs, E.P., Leibold M.A., Hendry A.P., De  
579 Meester, L., Carlson, S.M., Angert, A.L., & Giery, S.T. (2020). Evolutionary origins for  
580 ecological patterns. *Proceedings of the National Academy of Sciences, U.S.A.*, in press.
- 581 Vellend, M. (2010). Conceptual synthesis in community ecology. *The Quarterly Review of*  
582 *Biology*, 85, 183–206.
- 583 Vellend, M. (2016). *The theory of ecological communities*. Princeton University Press.
- 584 Viana, D.S., & Chase, J.M. (2019). Spatial scale modulates the inference of metacommunity  
585 assembly processes. *Ecology*, 100, e02576.
- 586 Warton, D. I., Blanchet, F.G., O’Hara, R.B., Ovaskainen, O., Taskinen, S., Walker, S.C. and  
587 Hui, F.K.C. (2015). So Many Variables: Joint Modeling in Community Ecology. *Trends in*  
588 *Ecology & Evolution* 30, 766–779.
- 589 Weiher, E., Freund, D, Bunton, T.,Stefanski, A., Lee, T., & Bentivenga, S. (2011). Advances,  
590 challenges and a developing synthesis of ecological community assembly theory.  
591 *Philosophical Transactions of the Royal Society: B Biological Sciences*, 366, 2403-2413.
- 592 Wilkinson, D.P., Golding, N., Guillera-Arroita, G., Tingley, R., & McCarthy, M.A. (2020).  
593 Defining and evaluating predictions of joint species distribution models. *Methods in Ecology*  
594 *and Evolution*, 12, 494-404.

595 Wiegand, T., Uriarte, M., Kraft, N.J.B., Shen, G., Wang, X., & He, F. (2017). Spatially explicit  
596 metrics of species diversity, functional diversity, and phylogenetic diversity: Insights into  
597 plant community assembly processes. *Annual Review of Ecology, Evolution, and Systematics*,  
598 48, 329–351.

599 Yang, X, Tan, J., Sun, K.H., & Jiang, L. Experimental demonstration of the importance of  
600 keystone communities for maintaining metacommunity biodiversity and ecosystem  
601 functioning. *Oecologia*, 193, 437-447.

602

603

604

605

606

607

608 Table 1: Summary of metacommunity level variation components for the seven different  
609 scenarios modeled in this study.

| Scenario | Corresponding Figure | Fractions     |               |               |                                 |
|----------|----------------------|---------------|---------------|---------------|---------------------------------|
|          |                      | E (SD)        | S (SD)        | C (SD)        | Residuals 1-R <sup>2</sup> (SD) |
| A        | 2, upper panels      | 0.75 (0.11)   | 0.026 (0.019) | 0.044 (0.062) | 0.18 (0.11)                     |
| B        | 2, lower panels      | 0.019 (0.015) | 0.15 (0.037)  | 0.019 (0.036) | 0.81 (0.04)                     |
| C        | 3, upper panels      | 0.42 (0.31)   | 0.21 (0.2)    | 0.14 (0.16)   | 0.23 (0.12)                     |
| D        | 3, lower panels      | 0.018 (0.026) | 0.35 (0.3)    | 0.28 (0.33)   | 0.35 (0.33)                     |
| E        | Supplement           | 0.63 (0.21)   | 0.067 (0.069) | 0.13 (0.15)   | 0.18 (0.089)                    |
| F        | Supplement           | 0.74 (0.097)  | 0.035 (0.025) | 0.047 (0.057) | 0.18 (0.097)                    |
| G        | 4                    | 0.5 (0.17)    | 0.08 (0.072)  | 0.2 (0.16)    | 0.22 (0.12)                     |

610

611

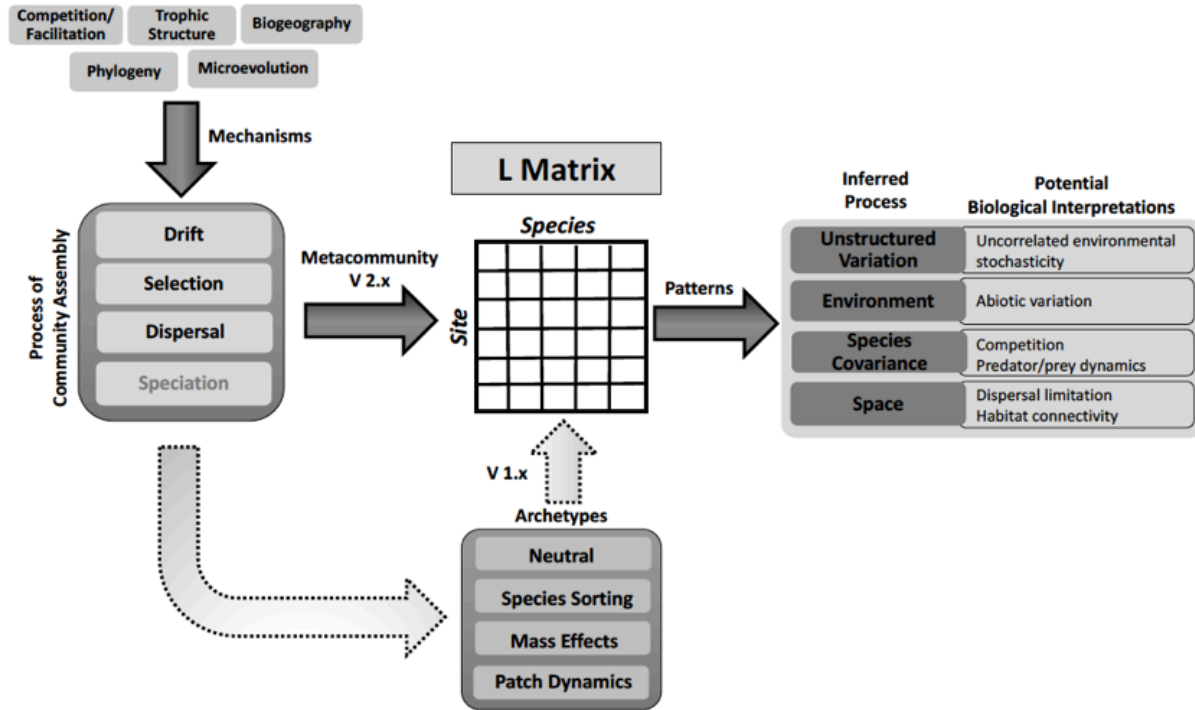

612

613 Figure 1: A summary of the metacommunity problem. Species distributions, denoted by the  
 614 species-by-sites **L** matrix, are the outcome of drift, selection, dispersal, and speciation. These  
 615 basic processes can be influenced by species interactions, food web structure, biogeography,  
 616 phylogeny and micro-evolution. Metacommunity theory mainly focuses on drift, selection and  
 617 dispersal. We view previous approaches based on the four archetypes of Leibold et al. (2004) as  
 618 being much more indirect and idealized. Instead, we call for a more direct evaluation of how the  
 619 basic processes affect the **L** matrix, and how to dissect the consequences to the distributions of  
 620 different species and the occupancy of different sites, for example by using a JSDM to identify  
 621 main effects and interspecific variability in the importance of unstructured, biotic,  
 622 environmental, and spatial effects on **L**. This approach allows us to recognize and address the  
 623 effects of heterogeneities among species and among patches on the overall structure of the  
 624 metacommunity.

625

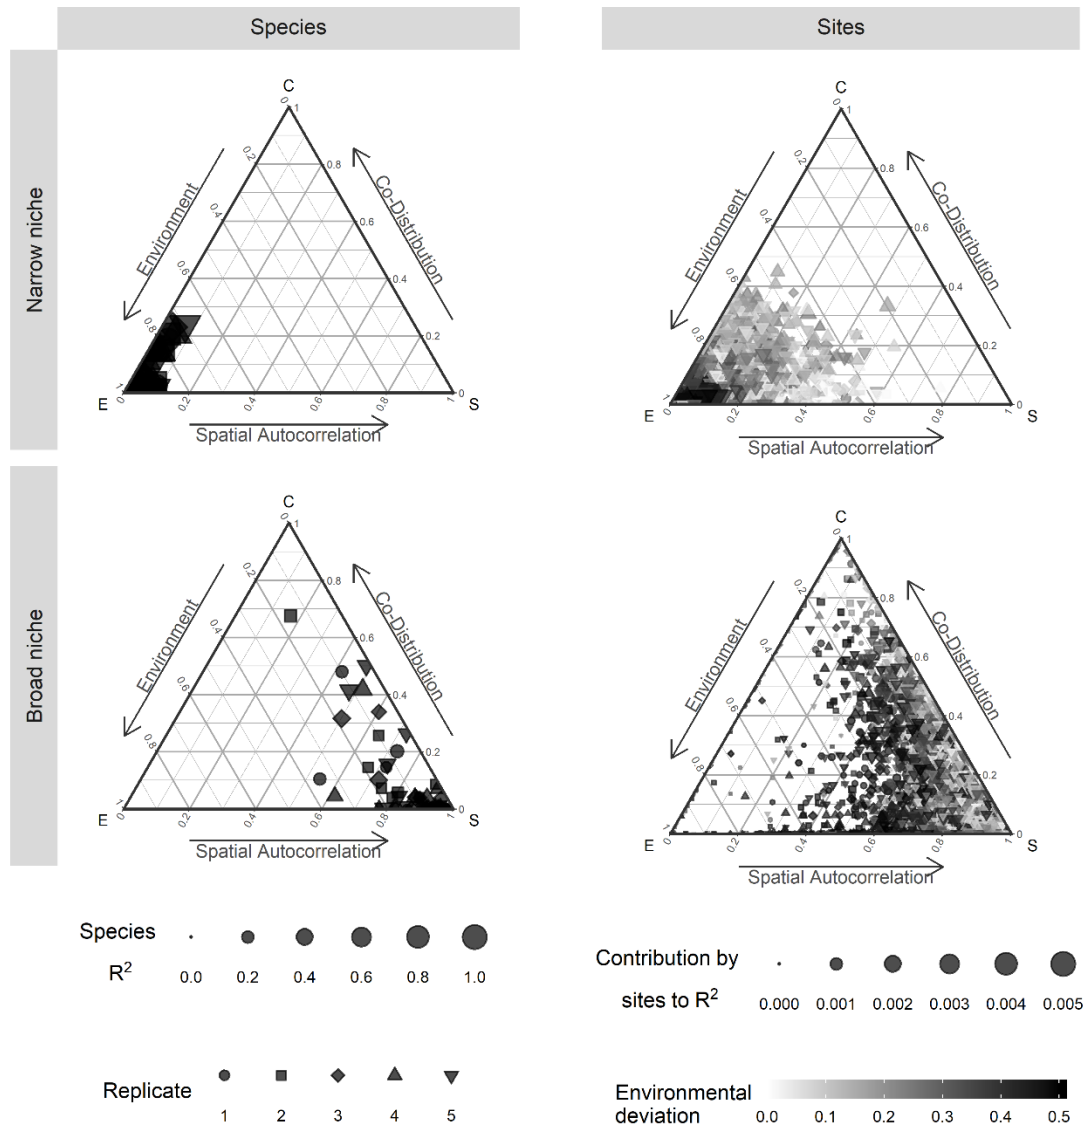

626

627 Figure 2: Ternary plots describing the three components of metacommunity internal structure for  
 628 two different simulation scenarios with no species interactions (independent metapopulations):  
 629 The upper panels correspond to narrow environmental niches whereas lower panels correspond  
 630 to wide environmental niches. Each dot represents a species (left panels) or a site (right panels).  
 631 The size of the symbol is proportional to the  $R^2$  of the model (note the different scales used for  
 632 species and sites) and the location indicates the proportion of explained variation attributed to  
 633 environmental factors ( $E$  - lower left), spatial effects ( $S$  - lower right) and remaining co-  
 634 distributions ( $C$  - upper apex) (see SI for details). In the species panels (left side) different  
 635 symbols indicate different replicate simulations; generally, these indicate that the distribution of  
 636 species responses are variable within replicates but that the overall variation among replicates are

637 repeatable. In the site panels (right side), the shading indicates how central (lighter) or extreme  
 638 (darker) the local environmental conditions are on the gradient; these also show substantial  
 639 variation but indicate that more extreme environmental conditions increase the effects of local  
 640 environment on occupancy patterns than more central conditions.  
 641  
 642

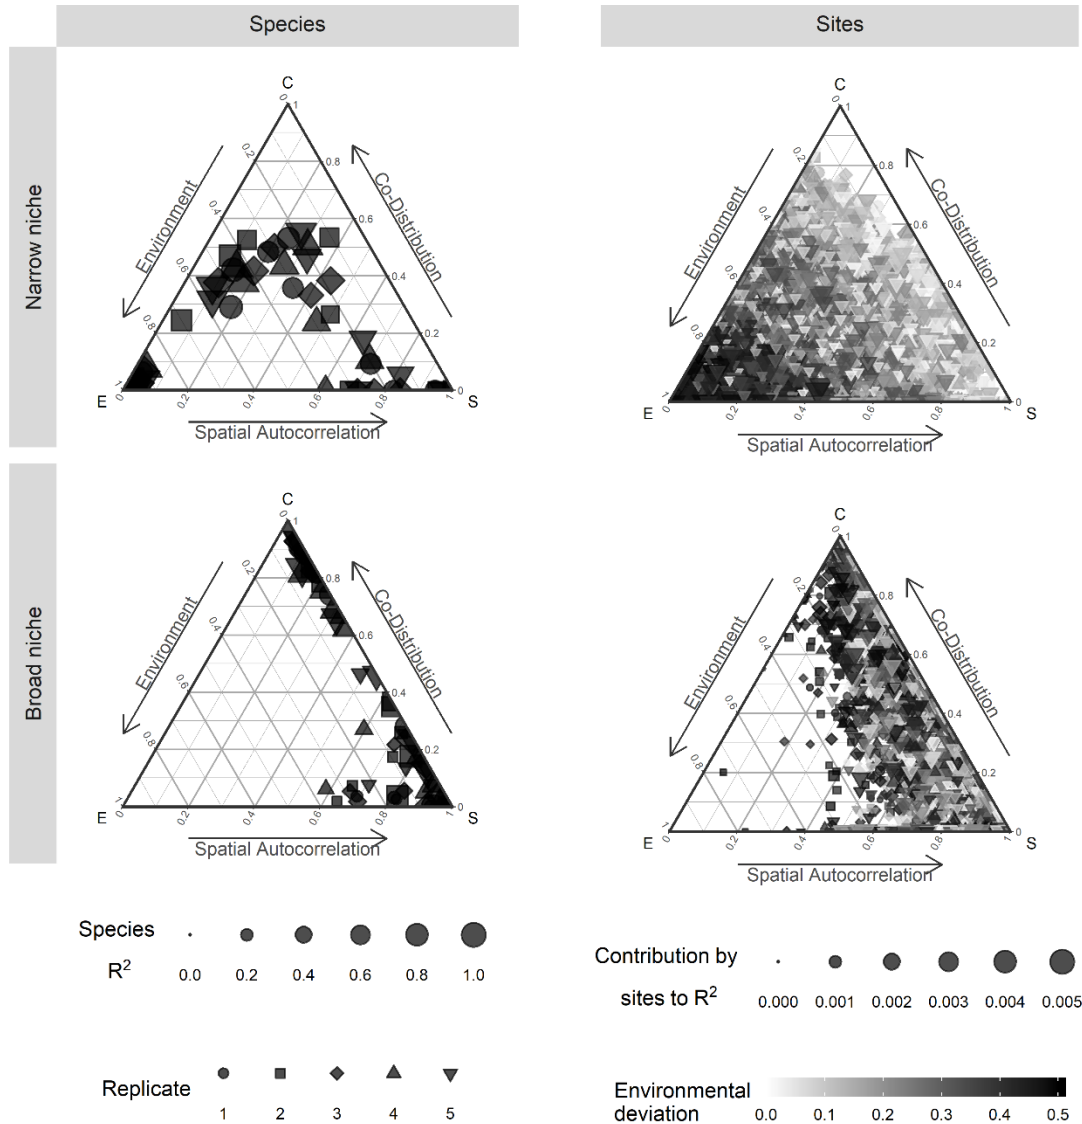

643  
 644 Figure 3: Ternary plots describing the three components of metacommunity internal structure for  
 645 different simulation scenarios with competition among the species. Notation is the same as in

646 Figure 2. The upper panels correspond to narrow environmental niches whereas the lower panels  
647 correspond to wide environmental niches. Left-hand panels show variation components for  
648 different species whereas panels on the right-hand side of the figure correspond to variation  
649 components for different sites.

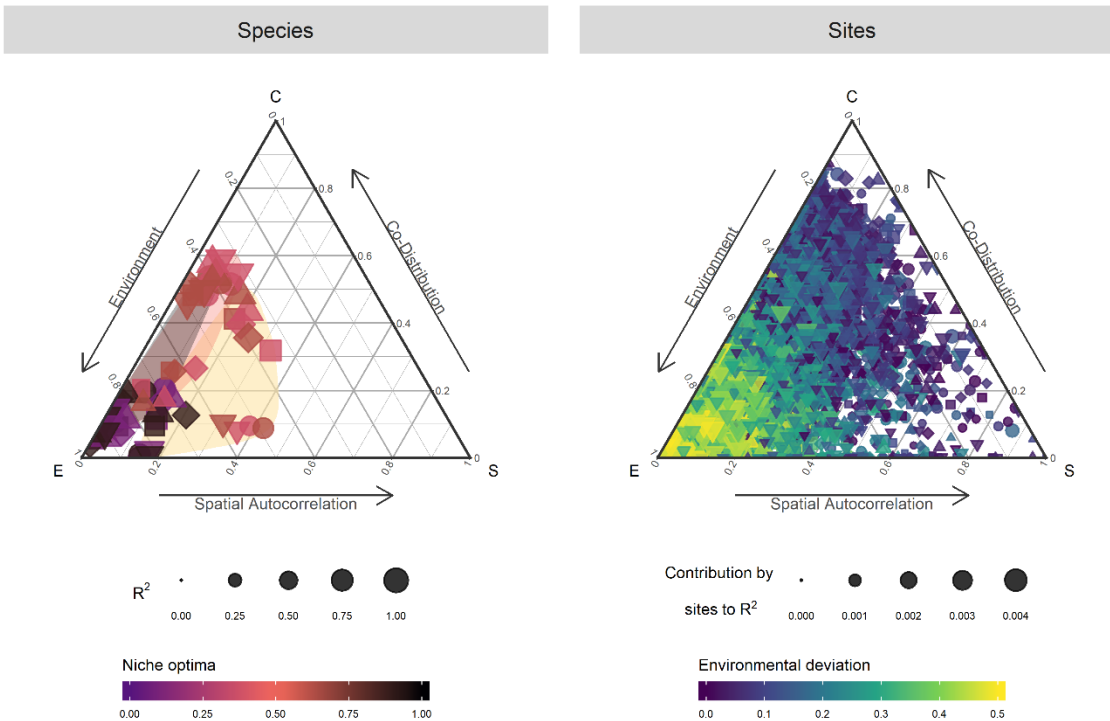

650

651 Figure 4: Ternary plots for species (left panel) and sites (right panel) for simulations with species  
652 that differ in environmental position along the gradient and dispersal ability. The size of the  
653 symbol indicates the  $R^2$  of the model for each species or site). In the left panel (species) the  
654 color indicates the preferred local environmental conditions for species (yellow for species that  
655 prefer centrally located environmental conditions, purple or magenta for species with more  
656 extreme environmental optima). The symbol indicates the dispersal rate of the species (circles  
657 are more dispersal limited, squares are least dispersal limited and triangles are intermediate). In  
658 the right-hand panel the color indicates the degree of deviation from centrality along the  
659 environmental gradient (as in Figure 2).

660

661

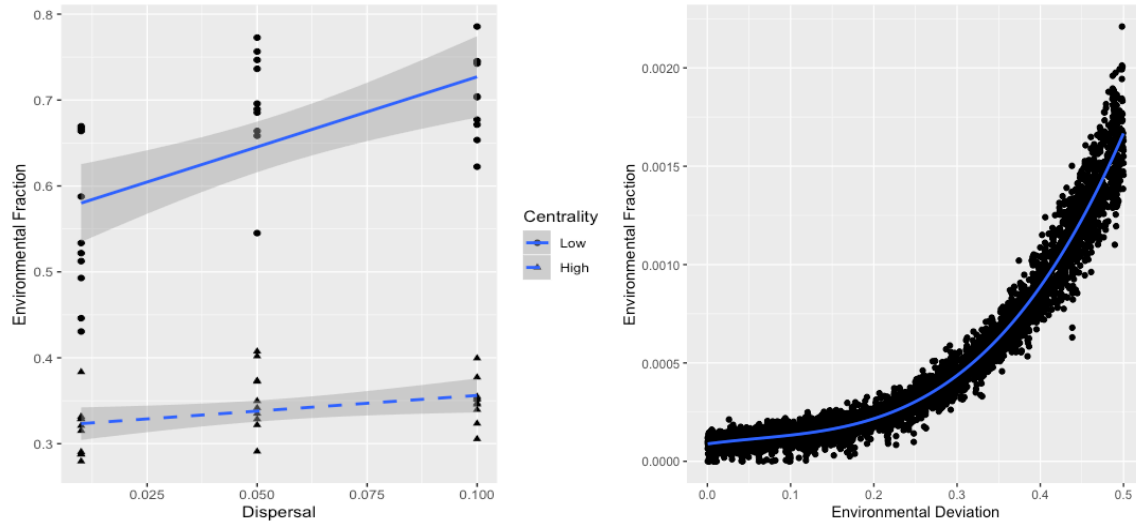

662

663 Figure 5: Effects of species traits (i.e. species optima; left panel) and site attributes (right panel)  
 664 on the environmental fraction of variation in species distributions and site occupancy. A) Higher  
 665 dispersal ability and lower niche centrality (i.e. greater deviation from mean niche value)  
 666 enhance the degree to which different species (individual symbols) have distributions that  
 667 correlate with environmental variation. B) Sites that differ more from the mean environmental  
 668 value (environmental deviation) are more likely to be occupied by species with niche traits that  
 669 are locally favored.

670

671

672

673

674

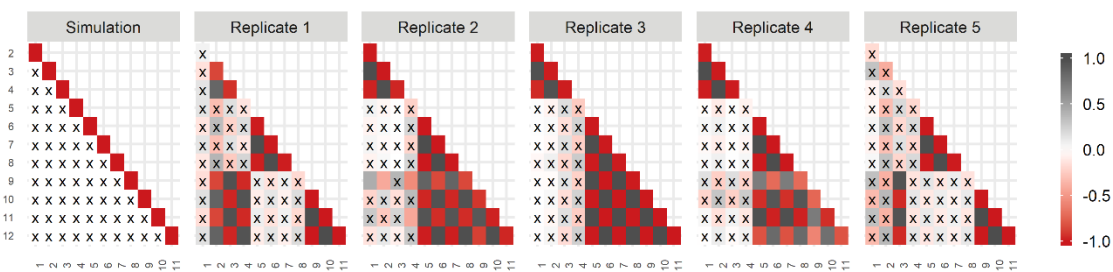

675



676 Figure 6: Comparisons of the interaction matrix (Simulation) with the co-distribution of species  
677 in five replicate runs (Iteration 1-5) of the scenario with interspecific variation in dispersal and  
678 competition among species. In each panel, species are ranked by the position of their  
679 environmental optima along the environmental gradient. The co-distributions are shown as heat  
680 maps with the strength of the covariation proportional to the intensity of color and the color  
681 indicating negative (green) or positive (gray) covariation among pairs of species. These can be  
682 compared to the pattern of direct species interactions (left panel called Simulations). The Xs  
683 denote no significant association although the color indicates the trend.  
684

## 685 The Internal Structure of Metacommunities: Supplementary 686 Information

687 Mathew A. Leibold, Javiera Rudolph, Pedro Peres-Neto, Dominique Gravel, Luc De Meester,  
688 Lauren Showmaker, Florian Hartig, F. Guillaume Blanchet, Jonathan M. Chase

### 689 Table of Contents

|     |                                                            |    |
|-----|------------------------------------------------------------|----|
| 690 | Description of Model                                       | 1  |
| 691 | Description of Statistical Framework                       | 5  |
| 692 | Parameterization and Simulation Scenarios                  | 8  |
| 693 | Example of metacommunity simulation functions and analyses | 10 |

694

695

## 696 Description of Model

### 697 Patch locations and environmental variables

698 In our model, the metacommunity consists of  $N$  patches distributed over a spatially  
699 heterogeneous landscape, with multiple environmental variables (although, the current  
700 simulations only have one environmental variable  $D$  across 1000 patches) that could either be  
701 randomly distributed or spatially autocorrelated. Each patch has a set of coordinates in a two-  
702 dimensional space, and all possible coordinates are feasible such that this is a continuous space  
703 model that is not restricted to a lattice or some other kind of regular spatial arrangement of  
704 spatial units. A patch may be empty or be occupied by a single or by several species. We define  
705  $X_{i,z,t}$  as a stochastic variable representing the occurrence of species  $i$  at location  $z$  and time  $t$ .  
706 Occurrence,  $X_{i,z,t}$ , takes a value of 1 when species  $i$  is present and a value of 0 when it is  
707 absent. Similarly, we define  $\mathbf{Y}_{z,t} = X_{1,z,t}, X_{2,z,t}, \dots, X_{R,z,t}$  as a vector containing the presence-  
708 absence of each species from the regional pool  $R$ .

709

710 The model only tracks patch occupancy (not population densities). Spatial dynamics occurs  
711 because of colonization events, in both empty patches and patches that are occupied by other  
712 species, and because of extinction events. The emerging species co-distributions are a result of  
713 a dynamic balance between these events. Ecological interactions can impact either or both the  
714 colonization and the extinction probabilities. For instance, the presence of a competitor pre-  
715 empting a patch can reduce the colonization probability by another competitor. Alternatively,  
716 the presence of a competitor in a patch could increase the extinction probability of another

717 species. Similarly, the environment could influence both the colonization and the extinction  
718 probabilities.

## 719 Patch Colonization

720 We consider a discrete-time Markovian process to represent the dynamics of presence-  
721 absence of all species and we incorporate the effect of dispersal, environmental filtering and  
722 ecological interactions in such a way that we could cover all possible scenarios wherein species  
723 differ in any combination of these mechanisms and processes. We can include interspecific  
724 competition along with other types of spatial dynamics such as predator-prey interactions  
725 (Gravel et al. 2011), priority effects (Shurin et al. 2004), or mutualistic interactions  
726 (e.g. Gilarranz et al. 2015). In this paper, we focused on competition only though. Following a  
727 colonization event from time  $t$  to  $t + \Delta$  corresponds to:

$$728 \quad P(X_{i,z,t+\Delta t} = 1 \mid X_{i,z,t} = 0) = I_{i,z,t} S_{i,z,t} C_{i,z,t}$$

729 where  $I_{i,z,t}$  is the number of immigrants of species  $i$  reaching patch  $z$  at time  $t$ ,  $S_{i,z,t}$  is the  
730 effect of environmental filtering on the probability of establishing a viable local population and  
731  $C_{i,z,t}$  is the effect of ecological interactions on the establishment probability. We note that  
732 because we represent a stochastic process, the product of these three functions has to be  
733 bounded between 0 and 1. We consequently define these quantities:

734 The effect of immigration is given by:

735

$$736 \quad I_{i,z,t} = \frac{\sum k(z, \omega) X_{i,\omega,t}}{\sum k(z, \omega)}$$

737

738 which is a weighted average of the occurrence probability of species  $i$  in the neighborhood  
739 of  $z$ . The function  $k(z, \omega)$  is a dispersal kernel that depends on the location of patch  $z$  and  
740 the neighborhood  $\omega$ . For convenience, we considered an exponential function of the  
741 Euclidean distance between localities. We added to the kernel a low distance and  
742 neighborhood-independent constant  $m$  to account from immigration from outside the  
743 simulated metacommunity. This assumption is required to prevent total extinction by drift  
744 under pure neutral dynamics.

745 The effect of the environment is given by a product of the establishment performance over  
746 all environmental variables  $E_n$ :

$$747 \quad S_{i,z,t} = \prod f(E_{n,z} \mu_{i,n} \sigma_{i,n})$$

748 In our simulations, for convenience, we considered that the function  $f$  has a quadratic form for  
749 all species and all environmental variables, though the model is flexible and general enough to  
750 consider other (non-linear) responses that could also differ among species.

## 751 **Ecological interactions on establishment probability**

752 To incorporate all possible ecological interactions, we started by representing the interaction  
753 network by a community matrix  $\mathbf{A}$  of  $R$  species. The elements  $\alpha_{ij}$  of  $\mathbf{A}$  quantify the effect of  
754 species  $j$  on the dynamics of species  $i$ . When  $\alpha_{ij}$  is negative, the colonization probability of  
755 species  $i$  decreases and/or its extinction probability increases when  $j$  is found locally. Inversely,  
756 when  $\alpha_{ij}$  is positive, the colonization probability increases and/or the extinction probability  
757 decreases. To account for the cumulative effects of local interactions on transition probabilities,  
758 we made colonization and extinction probabilities community dependent. As explained above,  
759 at a time  $t$ , the  $\mathbf{Y}_{z,t}$  vector gives the local assemblages. We calculated the sum of interactions at  
760 any time and for each species as  $v = \mathbf{A}_{z,t} \mathbf{Y}_{z,t}$ . Our approach can be interpreted as a spatial  
761 analogue to the generalized Lotka–Volterra model because it takes into account the impact of  
762 the whole network of interactions on each species dynamics and can deal with any type of  
763 interaction. We now define the function:

$$764 \quad C_{i,z,t} = g(v_i, z, t)$$

765 representing the total effect of ecological interactions on the colonization probability. For  
766 convenience, we will use a sigmoid function, with  $g$  ranging between  $c_{min}$  at high negative  
767 interactions and  $c_{max}$  at high positive interactions, where  $c_{max}$  should be interpreted as the  
768 maximal colonization probability when the environmental conditions are optimal and there are  
769 no dispersal limitations.

## 770 **Patch Extinction**

771 The definition of the extinction probability follows exactly the same rules as for colonization,  
772 except that extinction is independent of the neighborhood composition. We follow the same  
773 logic to define the effect of ecological interactions and of variation in the environment.  
774 Consequently, we get the Markovian process:

$$775 \quad P(X_{i,z,t+\Delta t} = 1 \mid X_{i,z,t} = 0) = M_{i,z,t} E_{i,z,t}$$

776

777 where  $M_{i,z,t}$  and  $E_{i,z,t}$  are the responses of the extinction probability to the local  
778 environment and to ecological interactions, respectively. The difference with the  
779 colonization functions defined in the previous section is that the extinction probability  
780 must be larger when interactions are negative and smaller when they are positive. In

781 addition, the extinction rate should be minimal (instead of maximal) at environmental  
782 optimum.

## 783 Interpretation

784 To interpret the model, note that, at steady state, for each species, we obtain the expected  
785 occurrence probability ( $\hat{P}$ ) at each site as:

$$786 \quad \frac{\hat{P}^{iz}}{1 - \hat{P}^{iz}} = \frac{I^{iz} \cdot S^{iz} \cdot C^{iz}}{M^{iz} \cdot E^{iz}}$$

787 After a log transformation, this yields:

$$788 \quad \log\left(\frac{\hat{P}^{iz}}{1 - \hat{P}^{iz}}\right) = \log(I^{iz}) + \log\left(\frac{S^{iz}}{M^{iz}}\right) + \log\left(\frac{C^{iz}}{E^{iz}}\right)$$

789

790 This last equation can be interpreted as a macroscopic description of the expected species  
791 distributions pattern (Thuiller et al. 2013). In this formulation,  $\log(I)$  describes the  
792 tendency of a patch to resemble other nearby patches due to the spatial contagion by  
793 dispersal,  $\log\left(\frac{S}{M}\right)$  describes the tendency of sites to be occupied by species with similar  
794 fitness responses to environmental gradients, and  $\log\left(\frac{C}{E}\right)$  describes the remaining  
795 influence of other species on co-occurrence due to interactions among species. The values  
796 for these indices will depend on what choices are made for the components of eq. 1 (see  
797 Supporting Information for details on how we implemented this simulations model).

798 This modeling framework can represent the classical archetypes but also permits more  
799 intricate (and likely far more realistic) metacommunity scenarios and predictions. For  
800 example, we could use the model to examine how species traits (and environmental  
801 context) link to metacommunity dynamics. Moreover, continuous mixtures of different  
802 metacommunity extremes (archetypes) can be represented by appropriate parameter  
803 choices for dispersal, competitive abilities, and environmental preferences. For instance,  
804 species sorting would require a relatively large colonization to extinction ratio along with  
805 species-specific environmental requirements and regional similarity (sensu Mouquet and  
806 Loreau, 2002). Alternatively, coexistence within competition-colonization trade-offs  
807 requires species to have similar responses to the environment and appropriate  
808 heterogeneities in the  $I$ ,  $C$  and  $E$  functions, but no environmental preferences.

809 The implemented mechanisms in the simulation model can be partially mapped onto  
810 variation partitioning components. For instance, at equilibrium, we could expect dispersal

811 limitation (the  $\log(I)$  term in equation 3) to create positive spatial autocorrelation at the  
812 dispersal scale (the  $[S/E]$  fraction in variation partitioning, i.e., spatial variation  
813 independent of environmental selection). Environmental selection (the  $\log\left(\frac{S}{M}\right)$  term in the  
814 last equation) should lead to a correlation between composition and environment (the  
815  $[E/S]$  fraction in variation partitioning). The last term in equation 3, however, describing  
816 the effect of interactions on distribution (the  $\log\left(\frac{C}{E}\right)$ ), is novel and has no equivalent in the  
817 context of classical variation partitioning.

818 There are some interesting properties to point out regarding our proposed variation  
819 partitioning scheme. First, by considering the combined effects of environmental selection,  
820 dispersal and interactions, the final residuals (unexplained sources of variation) in the  
821 model leading to this new partition variation scheme is (in principle) solely related to non-  
822 spatialized independent species variation. Second, in our variation partitioning, the  
823 interaction component is due to species co-variation (i.e., a joint component among species  
824 distributions). In empirical community data, however, this interpretation can only be made  
825 if all the environmental variation (predictors) underlying environmental selection in  
826 empirical community data has been incorporated (as pointed out in the main manuscript).  
827 If not, then the spatial and species interaction components could be measuring variation  
828 related to unmeasured environmental variables that are either spatialized (i.e.  
829 characterized by the spatial component in variation partitioning) or shared among species  
830 (i.e. joint component).

## 831 **Description of the Statistical Framework**

### 832 **Hierarchical Community Models**

833 In their simplest form, Hierarchical Community Models (HCMs) resemble standard species  
834 distribution models that regress species presences/absences against environmental predictors  
835 (i.e., logit link). However, to reduce model complexity, HCMs assume that all species in a  
836 metacommunity will react to environmental heterogeneity following a similar response  
837 function (e.g., linear vs quadratic or Gaussian). The same assumption is made in common  
838 variation partitioning (see Peres-Neto et al. 2006). To model the spatial component (i.e., due to  
839 spatialized dispersal), either spatial variables such as Moran's eigenvectors maps (MEM, Dray et  
840 al. 2006) or spatially auto-correlated latent variables (Ovaskainen et al. 2016b) can be  
841 incorporated to the model. To account for biotic interactions, non-spatially auto-correlated  
842 latent variables are used. If we use a linear specification approach (here, this can also include  
843 quadratic terms that capture Gaussian responses to environment as imposed in our model), we  
844 can write:

$$845 \quad \mathbf{L}^{zi} = \mathbf{X}^{zk} \mathbf{B}^{ki} + \epsilon^{zi}$$

846

847 with

848

$$\mathbf{B}^{ki} \mathcal{N}(\boldsymbol{\mu}, \boldsymbol{\Sigma})$$

849

850 where  $\mathbf{L}^{zi}$  is the presence (or absence) of species  $i$  (out of  $m$  species) at patch  $z$  (out of  $n$   
851 patches),  $\mathbf{X}^{zk}$  is the value of the environmental variable  $k$  (out of  $p$  variables) at site  $z$ ,  $\mathbf{B}$  is  
852 a matrix of regression parameters,  $\boldsymbol{\mu}$  is a vector of length  $p$  that describes the mean  
853 environmental response of all species,  $\boldsymbol{\Sigma}$  is a  $p \times p$  covariance matrix that describes how  
854 species vary (diagonal) and co-vary (off-diagonal) around the mean environmental  
855 response (Ovaskainen and Soininen 2011), and  $\epsilon^{zi}$  is a residual value. Estimating species  
856 parameters hierarchically around a community mean reduces the degrees of freedom and  
857 makes the model easier to fit with limited data. Note that both  $\boldsymbol{\mu}$  and  $\boldsymbol{\Sigma}$  can be further  
858 informed or constrained by species traits or phylogeny if desired (Ovaskainen et al. 2017).  
859 To account for biotic interactions, we consider latent variables  $\mathbf{H}^{zl}$  (where  $l$  refers to a  
860 latent variable measured at site  $z$ ) and their associated parameters  $\boldsymbol{\Lambda}^{li}$  (Ovaskainen et  
861 al. 2016a). This yields:

862

$$\mathbf{L}^{zi} = \mathbf{X}^{zk} \mathbf{B}^{ki} + \mathbf{H}^{zl} \boldsymbol{\Lambda}^{li} + \epsilon^{zi}$$

863

864 Note that it is not necessary to always include all of these components in one model; they  
865 can be considered in any combination deemed relevant for a particular question. In this  
866 paper, we used Moran's Eigenvector Maps (MEMs; Dray et al. 2006), a powerful and  
867 commonly used method to model spatial autocorrelation in statistical models involving  
868 species distributions.

## 869 **Calculating Variation Partitioning for the HCM**

870 As in any generalized linear mixed effect model, we can now partition the explained  
871 variation into different components, notably environmental heterogeneity, space, co-  
872 distribution (biotic interactions), and unexplained variation (Figure S1). To estimate the  
873 contributions of each of these four fractions for each species, we calculated semi-partial  
874 coefficients of determination (i.e., based on Type III sum-of-squares as specified in Peres-  
875 Neto et al. 2006) using the implementation suggested by Tjur (2009) as being more  
876 appropriate for presence-absence data (i.e., logit link) than the traditional variation  
877 partitioning based on an identity link. To adjust for the number of variables used to  
878 quantify each fraction of the variation partitioning analysis, we applied the adjustment to

879 the coefficient of determination proposed by Gelman and Pardoe (2006) in the variation  
880 partitioning analysis, which is designed for hierarchical models. As shown in Figure S1, the  
881 different fractions were combined so that a unique value was associated to environment  
882 (fractions [a], [d]/2, [f] and [g]/2), co-distribution (fraction [c]), space (fractions [b], [d]/2,  
883 [e] and [g]/2) and the unexplained portion of the variation (fraction [h]). Latent variables  
884 are quite powerful to isolate structure in the data. As such, in the calculation of the  
885 variation partitioning, latent variables will capture almost all (if not all) variation  
886 associated to the environment and space, giving an artificial inflation of the overlapping  
887 partitions between co-distribution and environment and co-distribution and space. For this  
888 reason, all partitions overlapping with co-distribution (fractions [e], [f] and [g]) were  
889 assigned to either environment (fractions [f] and [g]) or space (fractions [e] and [g]). In this  
890 calculation, a unique measure of explained variation (akin to adjusted  $R^2$ ) is associated to  
891 co-distribution (fraction [c]) but this is not the case for environment and space. To  
892 associate a unique value to environment and space, and represent the results as we did in  
893 Figure 2 and 3 (main manuscript), we divided the fractions overlapping environment and  
894 space between these two components. As such, the sum of fractions [a], [f], half of fraction  
895 [d] and half of fraction [g] were used to measure the effect of the environment while  
896 fractions [b], [e], half of fraction [d] and half of fraction [g] were used to  
897 measure the effect of space. This scheme in which half of common variation is assigned to  
898 two or more common components is commonly used in hierarchical partitioning (Chevan &  
899 Sutherland 1991).

900

901

902

903

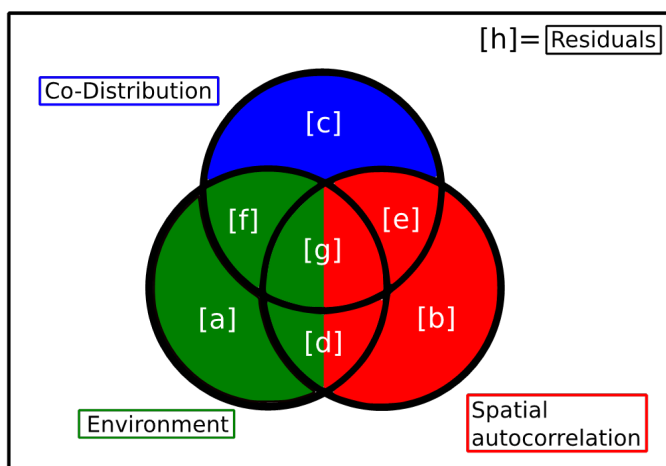

904



905 Supplementary Figure 1 – variation partitioning scheme used to estimate the importance of  
906 each matrix of predictors.

## 907 **Calculation of the coefficient of determination**

### 908 **1) Classic coefficient of determination**

909 The coefficient of determination,  $R^2$ , that was partitioned in the variation partitioning analysis  
910 (Appendix XX) is calculated for any given species  $j$  as:

$$911 \quad R_j^2 = 1 - \frac{\sum_{i=1}^n (y_{ij} - \hat{y}_{ij})^2}{\sum_{i=1}^n (y_{ij} - \bar{y}_{ij})^2}$$

912 where  $y_{ij}$  is the data (presence-absence) associated with species  $j$  (out of  $p$  species) at site  $i$   
913 (out of  $n$  sites),  $\hat{y}_{ij}$  is the model (predicted value) associated to species  $j$  at site  $i$  and  $\bar{y}_{ij}$  is the  
914 average of the data (i.e., sum of presences divided by  $n$ ) for species  $j$  across all sites.

### 915 **2) Community-level coefficient of determination**

916 Although having an  $R_j^2$  for each species  $j$  can be highly informative and is part of our framework  
917 on the internal structure of metacommunities, it can be also useful to estimate the contribution  
918 of single communities  $R^2$  to the entire metacommunity. This is obtained by averaging all  $R_j^2$ :

$$919 \quad {}^c R^2 = \frac{\sum_{j=1}^p R_j^2}{p}$$

920 where the  ${}^c R^2$  is the community-level  $R^2$ .

### 921 **3) Site contribution to the coefficient of determination**

922 In the paper, we use the contribution of each site to  $R_j^2$  to present how each site contributes  
923 differently to the environment, space and co-distribution for the community. The calculation of  
924 the site  $i$  contribution to the  $R_j^2$ , is calculated as:

$$925 \quad R_{ij}^2 = \frac{1}{n} - \frac{(y_{ij} - \hat{y}_{ij})^2}{\sum_{j=1}^p (y_{ij} - \bar{y}_{ij})^2}$$

926 The first part of the equation where the 1 of the classic  $R_j^2$  is divided by  $n$  is included to make  
927 sure that if we sum all  $R_{ij}^2$  across all sites for species  $j$ , the resulting value equals to  $R_j^2$ .

928 More importantly, what can be noticed is that by calculating  $R_{ij}^2$ , the contribution of sites to  
929 each species  $R_j^2$ , we obtain a matrix that has the same dimension as the site by species  
930 matrix (an  $n \times p$  matrix). Using this matrix, if we sum across all sites, we obtain the  $R_j^2$ .

931 However, if we average across the species for site  $i$  we obtain the site's contribution to the  
932 community-level  ${}^C R^2$  or  ${}^C R_i^2$ .

933 The amount of variation expressed by the  $R_j^2$ , the  ${}^C R^2$ , the  $R_{ij}^2$  or the  ${}^C R_i^2$  can all be  
934 partitioned in its environmental, spatial and co-distribution component following the  
935 procedure presented in the section "Calculating Variation Partitioning for the HCM" above.

## 936 **Parameterization and Simulation Scenarios**

937 We simulated metacommunity dynamics with a landscape of 1000 patches over 200 time steps  
938 and an initial occupancy of 0.8. Patches were placed randomly in a two-dimensional plane with  
939 coordinates drawn from a uniform distribution with a minimum of 0 and a maximum of 1. The  
940 environment varied spatially, with values drawn from a random distribution between 0 and 1.  
941 In the specific simulations we studied in the paper, colonization was the only component of the  
942 species that were affected by the environment (i.e.  $E_{i,z,t} = 1$ ). Specifically, colonization reacted  
943 to the environment following a quadratic curve.

944 For all scenarios considered, we simulated 12 species. Niche optimums for the species were  
945 evenly distributed between 0.1 and 0.9 while niche breadth was set to 0.8 for simulations  
946 with narrow niches (scenarios A, B, E, F, G), and to 2 for simulations where niche was  
947 assumed to be broad (scenarios C and D). For dispersal, we considered an exponential  
948 dispersal kernel, with a distance-independent immigration probability of 0.001 and an  $\alpha$   
949 parameter of 0.05. For scenario G, where we have variable dispersal kernels (Figure 3),  $\alpha$   
950 was 0.01 for 1/3 of species, 0.05 for 1/3 of species, and 0.1 for the other 1/3 of species. We  
951 used a sigmoid function to relate the total number of interactions with colonization and  
952 extinction coefficients following the implementation by Cazelles et al. (2016). Colonization  
953 probability in the absence of interactions was set at 0.4, which tends to zero as negative  
954 interactions tend to infinity, while it asymptotes at a 1 with infinite positive interactions.  
955 All other aspects of the colonization-interaction curve were the same for all scenarios.  
956 Similarly, extinction in the absence of interactions was set at 0.025, and tended to 1 with  
957 infinite negative interactions, while its asymptote tended to 0 with infinite positive  
958 interactions. In both cases, the parameter setting the shape of the sigmoid function was set  
959 to 0 for the scenarios without competition (scenarios A, B, and F), and 1.5 in the presence  
960 of competition (scenarios C, D, E, G). If there were interactions, then a focal species only  
961 interacted with the two species that had the closest niches. For all scenarios, five sets of  
962 metacommunities were simulated and analyzed to obtain the results found in Figures 2, 3,  
963 and 4 in the main text, and supplementary figures.

964 All scenarios have been implemented in R and the project's repository can be found here:  
965 [github.com/javirudolph/testingHMSC](https://github.com/javirudolph/testingHMSC)

966 Supplementary Figure 2. Species interactions for all scenarios.

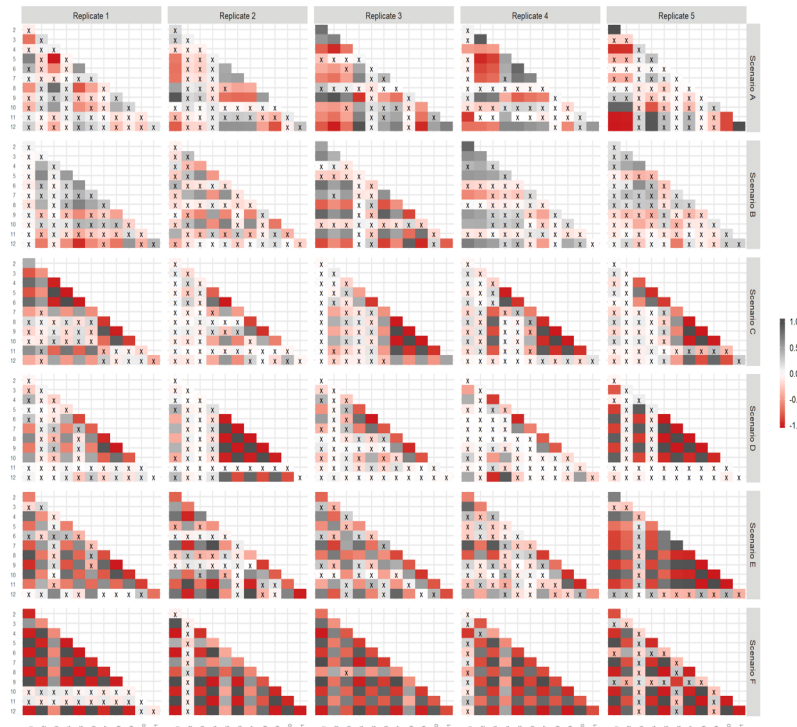

967

968 Supplementary Figure 3. In which we have half of the species with interactions and the  
 969 other without.

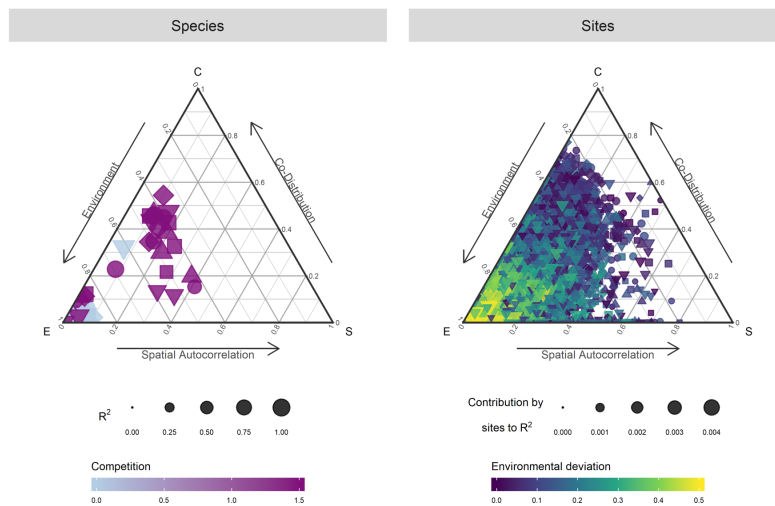

970

971 Supplementary Figure 4. In which we change dispersal only,  $\alpha$  was 0.01 for 1/3 of species,  
 972 0.05 for 1/3 of species, and 0.1 for the other 1/3 of species.

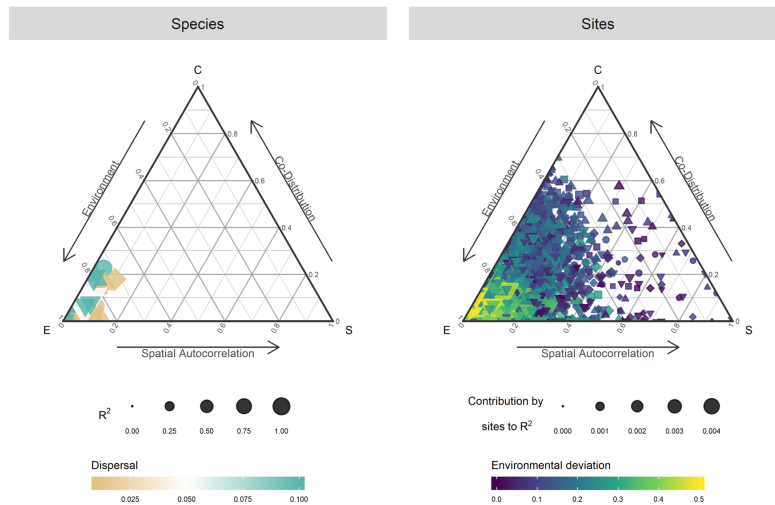

973

## 974 Example of metacommunity simulation functions and 975 analyses

976 The following example of code shows the overall processes involved in the metacommunity  
977 simulation for our model. This example shows the scenario for 20 patches and one  
978 environmental variable. The model gives the option for a random or spatially aggregated  
979 structure for the patches. In the aggregated case, we determined four clusters, denoted by  
980 `Nclusters` in the code below. The value of the environmental variable for each patch is shown  
981 with the color hue. In this case, the environmental variable is randomly distributed.

```
982 set.seed(227)
983 # Random XY coordinates
984 # Each coordinate is drawn from a random uniform distribution
985 get_XY = function(N) cbind(runif(N),runif(N))
986
987 # Aggregation of XY coordinates
988 get_XY_agg = function(N, Nclusters, sd_xy) {
989
990   Xclust = runif(Nclusters)
991   Yclust = runif(Nclusters)
992
993   X = rnorm(N, rep(Xclust,N/Nclusters), sd_xy)
994   Y = rnorm(N, rep(Yclust,N/Nclusters), sd_xy)
995
996   cbind(X,Y)
997 }
998
999 # Random uniform environmental values
1000 get_E = function(D, N) matrix(runif(D*N), nr = N, nc = D)
```

1001 Here, we set N, the number of patches to 20, and D, the number of environmental variables to  
1002 one.

```
1003 N <- 20
1004 D <- 1
```

```
1005  
1006 rXY <- get_XY(N)  
1007 agXY <- get_XY_agg(N, 4, 0.02)  
1008 E <- get_E(D = D, N = N)
```

1009 The following figure shows a side by side comparisson between random and aggregated  
1010 patches obtained from our functions.

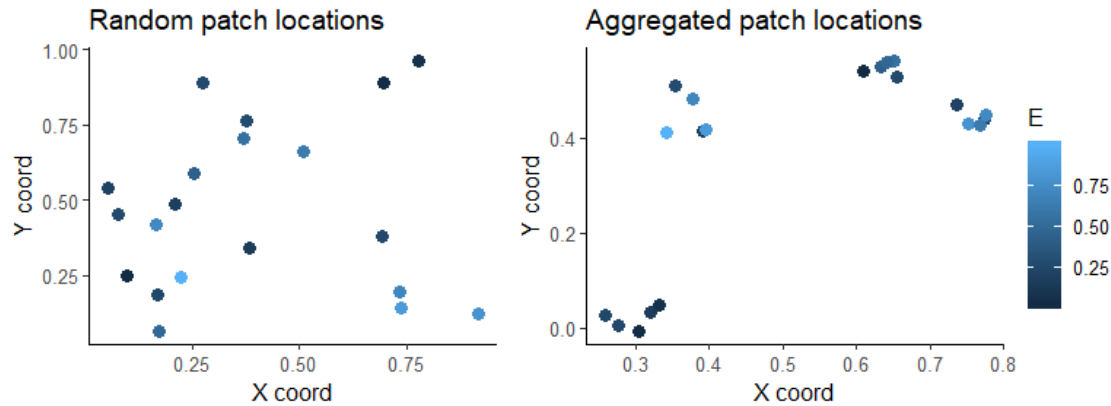

1011

## 1012 Initial Occupancy

1013 The toy model allows for setting the initial occupancy in the metacommunity. For example, to  
1014 create the initial conditions,  $t = 0$ , of presence absence, species occupancy is drawn from a  
1015 random uniform distribution, and values smaller than 0.8 are considered as species presence.  
1016 Patches or locations  $z$  are represented by rows in the matrix, whereas each species is a column.  
1017 Each cell in the matrix is  $X_{i,z,t}$  and each row is  $Y_{z,t}$  for  $t = 0$ . The following figure shows three  
1018 different iterations of this process, where areas in black represent occupancy = 1, and white  
1019 denotes an absence.

```
1020 #Get your initial conditions:  
1021 R <- 8  
1022 Y0 = matrix(0, nrow = N, ncol = R)  
1023 rand = matrix(runif(N*R), nr = N, nc = R)  
1024 Y0[rand < 0.8] = 1  
1025  
1026 ggplot(melt(Y0), aes(x = Var1, y = Var2, fill = value)) +  
1027   geom_tile() +  
1028   scale_fill_gradient(low = "white", high = "black")+  
1029   labs(x = "Plot number", y = "Species", subtitle = "Iteration 1") +  
1030   theme_bw() -> A  
1031  
1032 # Second iteration for the same initial conditions  
1033 Y0 = matrix(0, nrow = N, ncol = R)  
1034 rand = matrix(runif(N*R), nr = N, nc = R)  
1035 Y0[rand < 0.8] = 1  
1036  
1037 ggplot(melt(Y0), aes(x = Var1, y = Var2, fill = value)) +  
1038   geom_tile() +  
1039   scale_fill_gradient(low = "white", high = "black")+  
1040   labs(x = "Plot number", y = "", subtitle = "Iteration 2") +  
1041   theme_bw() -> B
```

```
1042
1043 # Third iteration
1044 Y0 = matrix(0, nrow = N, ncol = R)
1045 rand = matrix(runif(N*R), nr = N, nc = R)
1046 Y0[rand < 0.8] = 1
1047
1048 ggplot(melt(Y0), aes(x = Var1, y = Var2, fill = value)) +
1049   geom_tile() +
1050   scale_fill_gradient(low = "white", high = "black")+
1051   labs(x = "Plot number", y = "", subtitle = "Iteration 3") +
1052   theme_bw() -> C
1053
1054 # Set the three iterations to be displayed side by side
1055 ggarrange(A, B, C, ncol = 3, common.legend = TRUE, legend = "none")
```

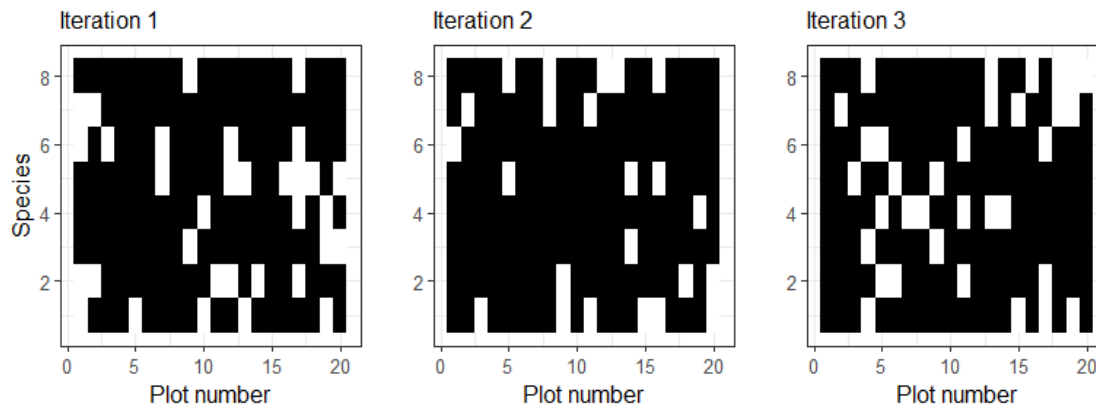

1056  
1057 When we consider the immigration component, we need to also consider the connectivity  
1058 matrix. In the code below, `I_f` calculates the probability of immigration for each species,  
1059 based on the occupancy matrix and the dispersal kernel,  $K$ . The argument  $\kappa$  is the  
1060 connectivity matrix. The argument  $XY$  corresponds to the patch coordinates, whereas  $\alpha$   
1061 is the dispersal parameter associated to the exponential distribution used for dispersal. It  
1062 can be computed with the following function:

```
1063 # Compute the propagule pressure
1064 I_f = function(Y, K, m) I = (1-m)*(K%*%Y)/(K%*%matrix(1,nr=N,nc=R)) + m
```

1065 The arguments for this function are:  $Y$ ,  $K$ ,  $m$ . We calculated  $Y$ , species presence or absence, in  
1066 the previous section with the case for initial conditions. Argument  $m$  is set in the parameters as  
1067 a value  $m = 0.001$  and the connectivity matrix  $K$  is calculated below.

```
1068 # Compute the connectivity matrix
1069 get_K = function(XY, alpha) {
1070   N = nrow(XY)
1071   distMat = as.matrix(dist(XY, method = "euclidean", upper = T, diag = T))
1072   ConMat = exp(-1/alpha*distMat)
1073   diag(ConMat) = 0
1074   return(ConMat)
1075 }
```

1076 As an example, using the aggregated XY coordinates for 20 patches and our initial occupancy  
1077 matrix with 8 species, we can see the connectivity between patches, and can calculate the  
1078 contribution of immigration from each species to each patch.

```
1079 # We can use the aggregated XY coordinates for this example:  
1080 XY <- agXY  
1081  
1082 # Connectivity matrix  
1083 alpha <- 0.005  
1084 K <- get_K(XY, alpha)  
1085 plot_K <- cbind(rownames(K), stack(as.data.frame(K)))  
1086 names(plot_K) <- c("X", "Fill", "Y")  
1087 plot_K %>%  
1088   as_data_frame() %>%  
1089   mutate(X = factor(X, levels = c(1:20)),  
1090          Y = factor(Y, levels = c(1:20))) -> plot_K  
1091 ggplot(plot_K, aes(x = X, y = Y, fill = Fill)) +  
1092   geom_raster() +  
1093   scale_fill_gradient(low = "black", high = "white") +  
1094   #scale_fill_viridis_c() +  
1095   labs(title = "Connectivity among patches") +  
1096   theme(legend.title = element_blank(),  
1097         axis.text.x = element_text(angle = 90)) -> A  
1098 # Immigration  
1099 m <- 0.001  
1100 Y <- Y0  
1101 I <- I_f(Y, K, m)  
1102 rastPlot(I, title = "I - Immigration to each plot", x = "Patches", y = "Species") +  
1103   theme(legend.title = element_blank()) -> plot_I  
1104 ggarrange(A, plot_I, ncol = 2)
```

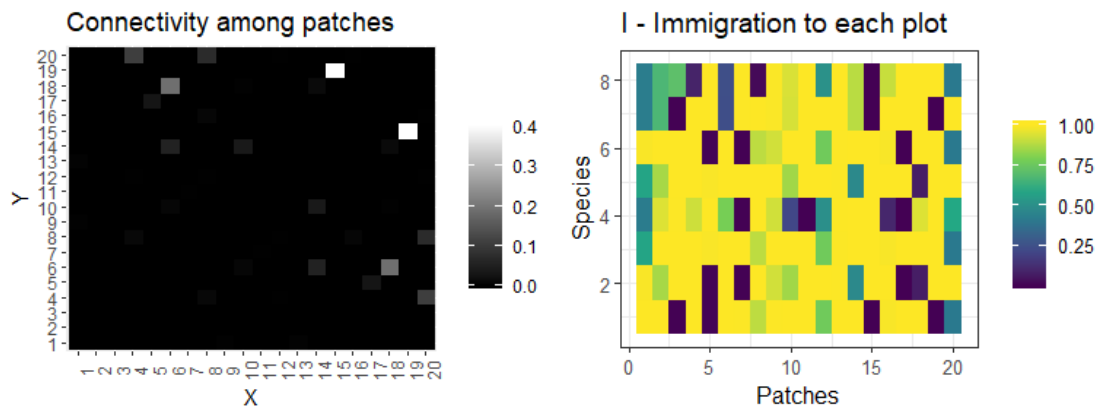

1105  
1106 The effect of the environment on each species, depending on each species niche optima, is  
1107 computed in the following code section. The argument  $E$  corresponds to the vector of values  
1108 for the environmental variable in each patch. The other two arguments in this function are  
1109 the niche optima ( $u_s$ ) for each species and niche breadth ( $s_c$ ).

```
1110 # Compute the Local performance of propagules  
1111 S_f_quadratic <- function(E, u_c, s_c) {  
1112   R <- ncol(u_c)  
1113   N <- nrow(E)  
1114   D <- ncol(E)  
1115   S <- matrix(1, nr = N, nc = R)
```



```
1116 for(i in 1:D){
1117   optima <- matrix(u_c[i,],nrow = N,ncol = R,byrow = TRUE)
1118   breadth <- matrix(s_c[i,],nrow = N,ncol = R,byrow = TRUE)
1119   S <- S * ((-1 / (breadth/2)^2) * (E[,i] - optima)^2 + 1)
1120   S <- ifelse(S < 0, 0, S)
1121 }
1122 }
1123 return(S)
1124 }
1125
1126 # Understood as niche optima for each species, for each environmental variable
1127 u_c = matrix(nr = D, nc = R)
1128 u_c[1,] = seq(0.1,0.9, length=R)
1129 # Understood as niche breadth
1130 s_c = matrix(0.2, nr = D, nc = R)
1131
1132 # Local performance, colonization
1133 S <- S_f_quadratic(E, u_c, s_c)
1134 plot_S <- rastPlot(S, title = "S - Local performance colonization", x = "Patches", y = "Species") +
1135   guides(fill = guide_colorbar(title = ""))
1136 plot_S
```

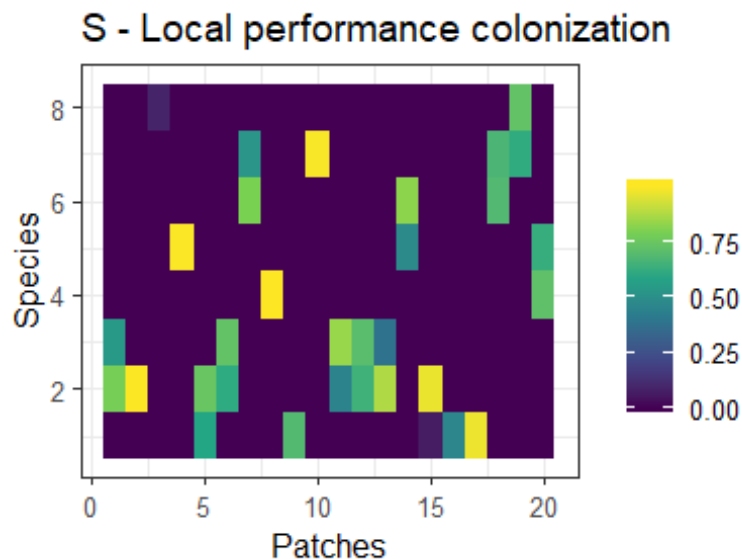

1138

1139 When incorporating species interactions into the toy model, we use the following  
1140 interaction matrix **A**, where the colored black sections show species with potential of  
1141 interacting:

```
1142 # # Interaction matrix
1143 A = matrix(0,nr=R,nc=R)
1144 d = as.matrix(dist(c(1:R),upper=TRUE,diag=T))
1145 A[d<=1] = -1
1146 diag(A) = 0
1147
1148 plot_A <- rastPlot(A, title = "A - Interaction matrix", x = "species", y = "species") +
1149   scale_fill_gradient(low = "black", high = "grey") +
1150   theme(legend.position = "none")
```



```
1151 # Compute the sum of ecological interactions for every location and every species
1152 sum_interactions = function (A, Y) t(A%*%t(Y))
1153 # this is considered to be "v"
1154 v <- sum_interactions(A, Y)
1155
1156 plot_v <- rastPlot(v, title = "v - Sum of interactions", x = "patches", y = "species") +
1157   guides(fill = guide_colorbar(title = "")) +
1158   scale_fill_gradient()
1159
1160 ggarrange(plot_A, plot_v, ncol = 2)
```

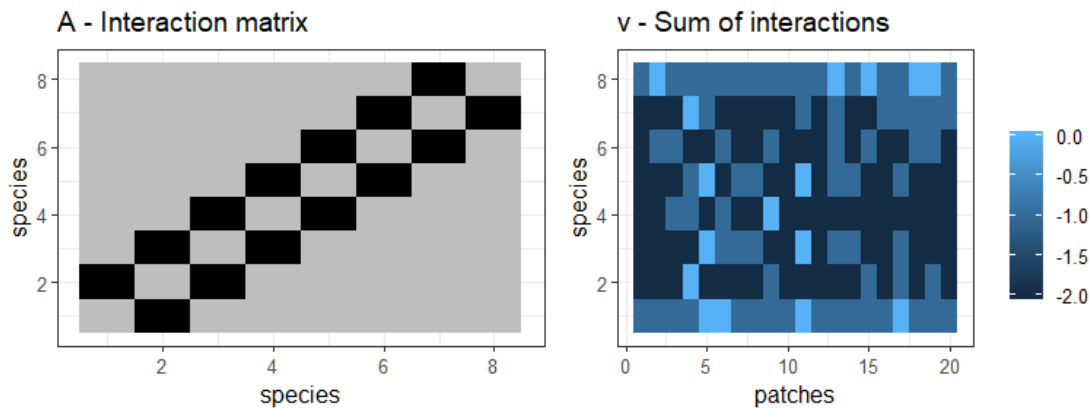

1161

1162 We compute the effect of ecological interactions on colonization probability with the  
1163 function below. The arguments for this function are  $v$  as the resulting matrix from the sum  
1164 of interactions,  $d_c$  as the sensitivity to interactions,  $c_\theta$  and  $c_{max}$  as the colonization  
1165 parameters:

```
1166 C_f = function(v, d_c, c_0, c_max) c_max*(1 +(1/c_0 - 1)*exp(-v*d_c))^-1
1167
1168 ## Colonization function
1169 c_0 = rep(0.4, R) # Colonization at 0 interactions
1170 c_max = rep(1, R) # Colonization at max interactions
1171
1172 ## Sensitivity to interactions
1173 d_c = 0.2
1174
1175 C <- C_f(v, d_c, c_0, c_max)
1176 plot_C <- rastPlot(C, title = "C - Interactions on colonization", x = "Patches", y = "Species") +
1177   guides(fill = guide_colorbar(title = "")) +
1178   scale_fill_gradient()
1179
1180 plot_C
```

### C - Interactions on colonization

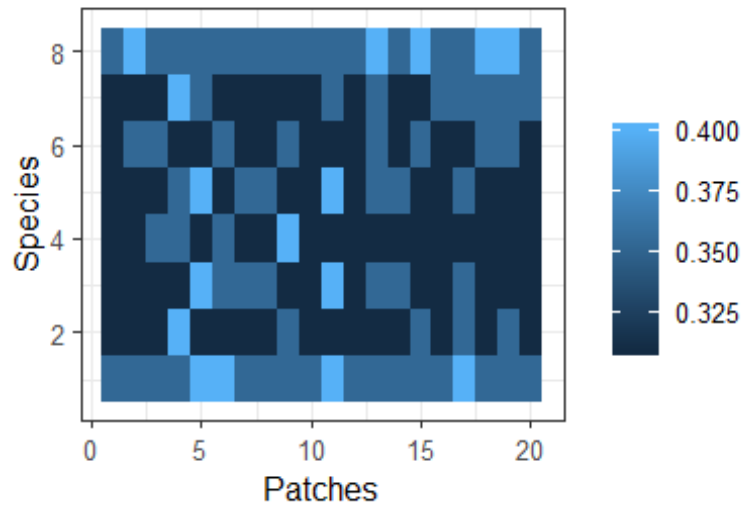

1181

1182 With all the components calculated, we can now compute the colonization probability

1183  $P(X_{i,z,t+\Delta t} = 1 \mid X_{i,z,t} = 0) = I_{i,z,t} S_{i,z,t} C_{i,z,t}$

### Probability of colonization for each species on each patch

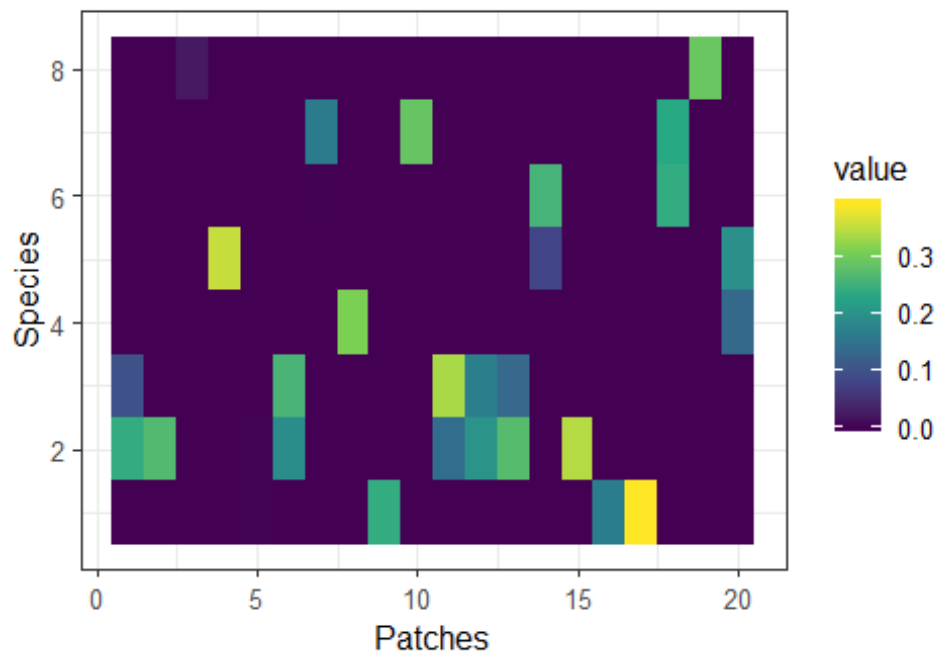

1184

1185 The following function calculates the effect of the environment on the extinction, with  $E$

1186 being the environmental variable, and  $u_e$  and  $u_s$  being species level effect and the

1187 asymptote.

```
1188 M_f = function(E, u_e, s_e) {
1189   R = ncol(u_e)
1190   N = nrow(E)
1191   D = ncol(E)
1192   M = matrix(1, nr = N, nc = R)
1193   for(i in 1:D){
1194     M = M*(1-exp(-(E[,i]-matrix(u_e[i,],nr=N,nc=R,byrow=TRUE))^2 / matrix(s_e[i,],nr=N,nc=R,
1195 byrow=TRUE)^2))
1196   }
1197   return(M)
1198 }
1199
1200 # Set the function arguments
1201 ## Effect of the environment on extinction
1202 u_e = matrix(nr = D, nc = R)
1203 u_e[1,] = c(rep(0.5, R-1), 0.05) # One species having a lower level of extinction from envir
1204 onmental effect
1205 s_e = matrix(Inf, nr = D, nc = R)
1206
1207 #u_e
1208 #head(s_e)
```

1209 The following shows the effect of ecological interactions on extinction, using the same  $v$  matrix  
1210 calculated above.

```
1211 E_f = function(v, d_e, e_0, e_min) {
1212   e_min_mat = matrix(e_min, nr = N, nc = R, byrow=TRUE)
1213   e_min_mat+(1/(1-e_min_mat)+(1/(e_0-e_min_mat)-1/(1-e_min_mat))*exp(d_e*v))^-1
1214
1215 }
1216
1217 }
1218
1219 #With the arguments computed as:
1220
1221 ## Extinction function
1222 #e_0 = c(rep(0.025, R-1), 0.5) # Extinction at 0 interactions, with one species having a hig
1223 her value.
1224 e_0 = rep(0.025, R)
1225 e_min = rep(0, R) # Extinction at max interactions
1226
1227 ## Sensitivity to interactions
1228
1229 d_e = 0
1230
1231
```

1232 We can now compute the probability of extinction  $P(X_{i,z,t+\Delta t} = 1 \mid X_{i,z,t} = 0) = M_{i,z,t}E_{i,z,t}$

1233 The figure shows these as identical graphs, since we have made all species have the same  
1234 probability of extinction and the environment not having an effect on extinction.

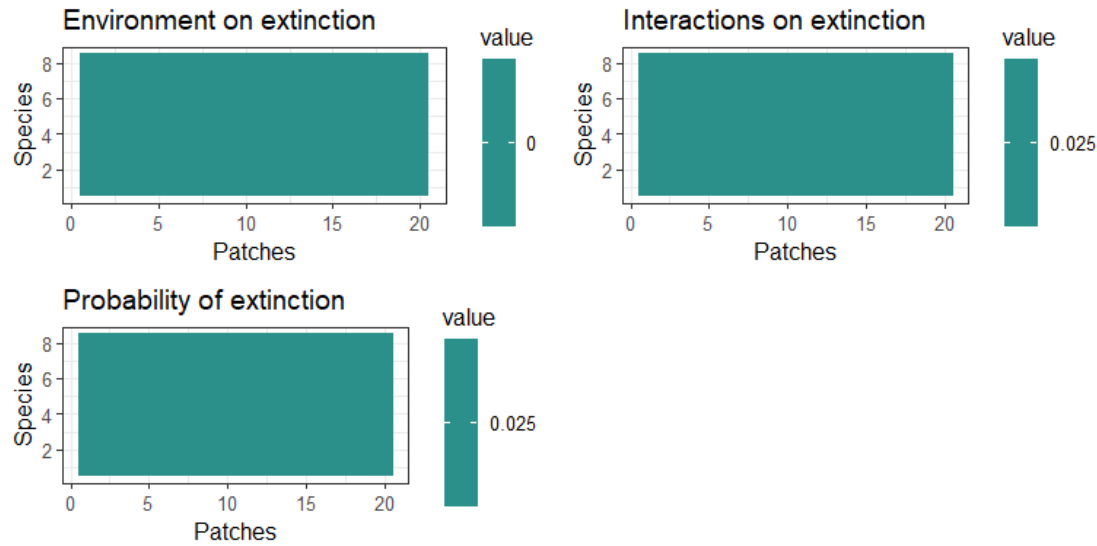

1235 The way  
1236 parameters are set, the extinction component is the same for all species in every patch.

## 1237 Testing and changes

```
1238 # Perform the test  
1239 delta <- matrix(0, nr = N, nc = R)  
1240 rand <- matrix(runif(N*R), nr = N, nc = R)  
1241 delta[Y == 0 & rand < P_col] <- 1  
1242  
1243 # Perform the test  
1244 rand = matrix(runif(N*R), nr = N, nc = R)  
1245 delta[Y == 1 & rand < P_ext] = - 1
```

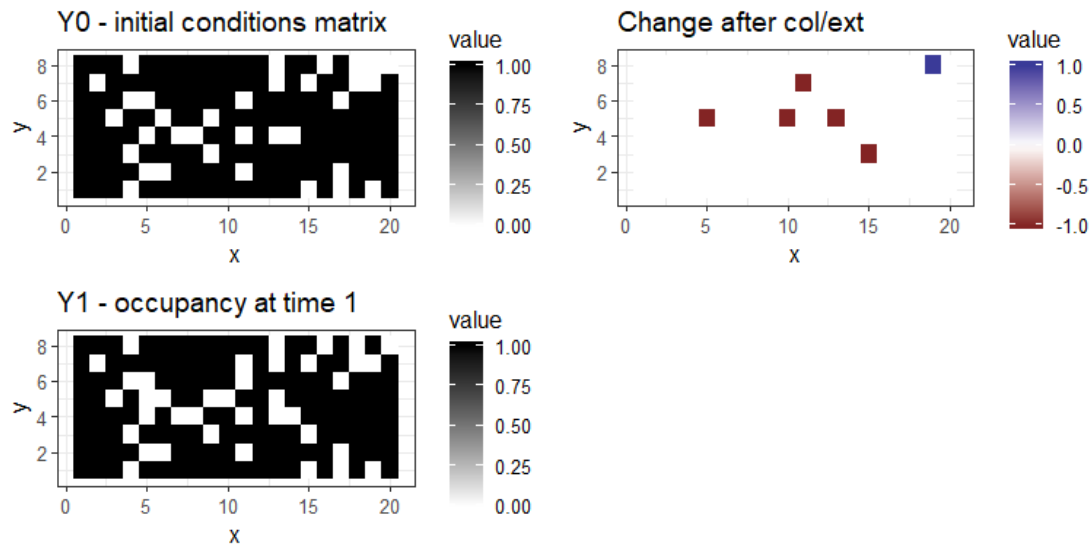

1246  
1247 References:

1248 Chevan, A., & Sutherland, M. (1991). Hierarchical partitioning. *American Statistician*, 45, 90-  
1249 96.

- 1250 Dray, S., P. Legendre, & Peres-Neto, P.R. (2006). Spatial modeling: a comprehensive framework  
1251 for principal coordinate analysis of neighbor matrices (PCNM). *Ecological Modelling*, 196, 483-  
1252 493.
- 1253  
1254 Efron, B. (1978). Regression and ANOVA with zero-one data: Measures of residual Variation.  
1255 *Journal of the American Statistical Association*, 73, 113–121.
- 1256  
1257 Gelman, A., & Pardoe, I. (2006). Bayesian Measures of Explained Variance and Pooling in  
1258 Multilevel (Hierarchical) Models. *Technometrics*, 48, 241–251.
- 1259  
1260 Gilarranz, L. J., Sabatino, M., Aizen, M. A., & Bascompte, J. (2015). Hot spots of mutualistic  
1261 networks. *Journal of Animal Ecology*, 84, 407-413.
- 1262  
1263 Gravel, D., Massol, F., Canard, E., Mouillot, D. & Mouquet, N. (2011). Trophic theory of island  
1264 biogeography. *Ecology Letters*, 14, 1010–1016.
- 1265  
1266 Ovaskainen, O., Abrego, N., Halme, P. & Dunson, D. (2016a). Using latent variable models to  
1267 identify large networks of species-to-species associations at different spatial scales. *Methods in*  
1268 *Ecology and Evolution*, 7, 549–555.
- 1269  
1270 Ovaskainen, O., Hottola, J. & Siitonen, J. (2010). Modeling species co-occurrence by  
1271 multivariate logistic regression generates new hypotheses on fungal interactions. *Ecology*, 91,  
1272 2514–2521.
- 1273  
1274 Ovaskainen, O., Roy, D.B., Fox, R. & Anderson, B.J. (2016b). Uncovering hidden spatial  
1275 structure in species communities with spatially explicit joint species distribution models.  
1276 *Methods in Ecology and Evolution*, 7, 428–436.
- 1277  
1278 Ovaskainen, O., & Soininen, J. (2011). Making more out of sparse data: hierarchical modeling of  
1279 species communities. *Ecology*, 92, 289–295.
- 1280  
1281 Ovaskainen, O., Tikhonov, G., Norberg, A., Guillaume Blanchet, F., Duan, L., Dunson, D., et  
1282 al. (2017). How to make more out of community data? A conceptual framework and its  
1283 implementation as models and software. *Ecology Letters*, 20, 561–576.

1284

1285 Peres-Neto, P.R., Legendre, P., Dray, S., & Borcard, D. (2006). Variation partitioning of species  
1286 data matrices: Estimation and comparison of fractions. *Ecology*, 87, 2614–2625.

1287

1288 Shurin, J.B., Amarasekare, P., Chase, J.M., Holt, R.D., Hoopes, M.F. & Leibold, M.A. (2004).  
1289 Alternative stable states and regional community structure. *Journal of Theoretical Biology*, 227,  
1290 359–368.

1291

1292 Tjur, T. (2009). Coefficients of determination in logistic regression models-A new proposal: the  
1293 coefficient of discrimination. *The American Statistician*, 63, 366–372.

1294
